# Supplementary material for: Novel diagnostic and therapeutic techniques reveal changed metabolic profiles in recurrent focal segmental glomerulosclerosis
Source: Springer Nature journal article supplement (doi:10.1038/s41598-021-83883-w), 2021-02-25
Supplement: MOESM2 [file 41598_2021_83883_MOESM2_ESM.pdf]

| < 50 kDa CTRL serum |                              | < 50 kDa FSGS serum at recurrence |                              | < 50 kDa FSGS serum at remission |                              |
|---------------------|------------------------------|-----------------------------------|------------------------------|----------------------------------|------------------------------|
| Raman Shift (cm-1)  | Raman intensity (arb. units) | Raman Shift (cm-1)                | Raman intensity (arb. units) | Raman Shift (cm-1)               | Raman intensity (arb. units) |
| 300                 | 634                          | 300                               | 776                          | 300                              | 634                          |
| 302                 | 537                          | 302                               | 520                          | 302                              | 534                          |
| 305                 | 520                          | 305                               | 468                          | 305                              | 479                          |
| 307                 | 361                          | 307                               | 346                          | 307                              | 375                          |
| 309                 | 353                          | 309                               | 336                          | 309                              | 318                          |
| 311                 | 324                          | 311                               | 246                          | 311                              | 256                          |
| 313                 | 268                          | 313                               | 262                          | 313                              | 196                          |
| 316                 | 172                          | 316                               | 184                          | 316                              | 137                          |
| 318                 | 208                          | 318                               | 130                          | 318                              | 125                          |
| 320                 | -22                          | 320                               | 67                           | 320                              | 102                          |
| 322                 | 64                           | 322                               | 1                            | 322                              | 28                           |
| 325                 | 95                           | 325                               | 82                           | 325                              | -4                           |
| 327                 | -18                          | 327                               | 11                           | 327                              | 22                           |
| 329                 | -11                          | 329                               | 0                            | 329                              | -33                          |
| 331                 | -9                           | 331                               | -21                          | 331                              | 38                           |
| 334                 | -47                          | 334                               | 0                            | 334                              | 25                           |
| 336                 | 83                           | 336                               | 10                           | 336                              | -43                          |
| 338                 | -13                          | 338                               | 91                           | 338                              | 1                            |
| 340                 | 190                          | 340                               | -6                           | 340                              | 42                           |
| 343                 | 145                          | 343                               | 50                           | 343                              | 42                           |
| 345                 | 139                          | 345                               | 43                           | 345                              | 23                           |
| 347                 | 131                          | 347                               | 110                          | 347                              | 44                           |
| 349                 | 167                          | 349                               | 148                          | 349                              | 96                           |
| 352                 | 262                          | 352                               | 65                           | 352                              | 120                          |
| 354                 | 215                          | 354                               | 183                          | 354                              | 198                          |
| 356                 | 282                          | 356                               | 202                          | 356                              | 140                          |
| 358                 | 284                          | 358                               | 131                          | 358                              | 176                          |
| 361                 | 233                          | 361                               | 199                          | 361                              | 123                          |
| 363                 | 261                          | 363                               | 178                          | 363                              | 193                          |
| 365                 | 364                          | 365                               | 191                          | 365                              | 218                          |

|     |      |     |      |     |     |
|-----|------|-----|------|-----|-----|
| 367 | 142  | 367 | 216  | 367 | 249 |
| 369 | 363  | 369 | 252  | 369 | 272 |
| 372 | 302  | 372 | 273  | 372 | 202 |
| 374 | 203  | 374 | 379  | 374 | 236 |
| 376 | 327  | 376 | 358  | 376 | 250 |
| 378 | 370  | 378 | 384  | 378 | 270 |
| 381 | 368  | 381 | 361  | 381 | 251 |
| 383 | 303  | 383 | 455  | 383 | 340 |
| 385 | 431  | 385 | 380  | 385 | 300 |
| 387 | 410  | 387 | 476  | 387 | 238 |
| 390 | 335  | 390 | 453  | 390 | 330 |
| 392 | 452  | 392 | 430  | 392 | 254 |
| 394 | 484  | 394 | 569  | 394 | 372 |
| 396 | 434  | 396 | 622  | 396 | 425 |
| 398 | 605  | 398 | 680  | 398 | 424 |
| 401 | 589  | 401 | 784  | 401 | 408 |
| 403 | 579  | 403 | 793  | 403 | 365 |
| 405 | 566  | 405 | 1009 | 405 | 541 |
| 407 | 687  | 407 | 1092 | 407 | 493 |
| 410 | 592  | 410 | 1152 | 410 | 527 |
| 412 | 726  | 412 | 1262 | 412 | 538 |
| 414 | 686  | 414 | 1304 | 414 | 558 |
| 416 | 756  | 416 | 1371 | 416 | 595 |
| 418 | 749  | 418 | 1294 | 418 | 668 |
| 421 | 987  | 421 | 1254 | 421 | 656 |
| 423 | 882  | 423 | 1284 | 423 | 760 |
| 425 | 889  | 425 | 1154 | 425 | 686 |
| 427 | 862  | 427 | 1169 | 427 | 762 |
| 430 | 1038 | 430 | 1202 | 430 | 776 |
| 432 | 873  | 432 | 1226 | 432 | 829 |
| 434 | 1000 | 434 | 1101 | 434 | 868 |
| 436 | 1049 | 436 | 1149 | 436 | 835 |
| 438 | 1129 | 438 | 1097 | 438 | 862 |

|     |      |     |      |     |     |
|-----|------|-----|------|-----|-----|
| 441 | 1019 | 441 | 1086 | 441 | 903 |
| 443 | 1042 | 443 | 1085 | 443 | 839 |
| 445 | 1067 | 445 | 1147 | 445 | 859 |
| 447 | 1007 | 447 | 1130 | 447 | 852 |
| 449 | 1043 | 449 | 1096 | 449 | 861 |
| 452 | 1029 | 452 | 1156 | 452 | 862 |
| 454 | 929  | 454 | 1167 | 454 | 936 |
| 456 | 1098 | 456 | 1143 | 456 | 843 |
| 458 | 1103 | 458 | 1148 | 458 | 940 |
| 460 | 1022 | 460 | 1193 | 460 | 857 |
| 463 | 1017 | 463 | 1237 | 463 | 838 |
| 465 | 1056 | 465 | 1325 | 465 | 839 |
| 467 | 1024 | 467 | 1479 | 467 | 931 |
| 469 | 988  | 469 | 1545 | 469 | 875 |
| 472 | 945  | 472 | 1685 | 472 | 857 |
| 474 | 993  | 474 | 1866 | 474 | 923 |
| 476 | 1098 | 476 | 1945 | 476 | 903 |
| 478 | 1064 | 478 | 2007 | 478 | 921 |
| 480 | 1074 | 480 | 2192 | 480 | 948 |
| 483 | 1034 | 483 | 2144 | 483 | 863 |
| 485 | 1071 | 485 | 2038 | 485 | 898 |
| 487 | 1000 | 487 | 1997 | 487 | 909 |
| 489 | 1020 | 489 | 1893 | 489 | 910 |
| 491 | 1058 | 491 | 1811 | 491 | 883 |
| 494 | 995  | 494 | 1661 | 494 | 856 |
| 496 | 1071 | 496 | 1579 | 496 | 836 |
| 498 | 902  | 498 | 1417 | 498 | 782 |
| 500 | 1059 | 500 | 1391 | 500 | 834 |
| 502 | 943  | 502 | 1278 | 502 | 827 |
| 505 | 903  | 505 | 1180 | 505 | 802 |
| 507 | 886  | 507 | 1155 | 507 | 786 |
| 509 | 991  | 509 | 1103 | 509 | 779 |
| 511 | 940  | 511 | 1020 | 511 | 754 |

|     |      |     |      |     |     |
|-----|------|-----|------|-----|-----|
| 513 | 1021 | 513 | 1038 | 513 | 752 |
| 516 | 791  | 516 | 1037 | 516 | 785 |
| 518 | 853  | 518 | 1002 | 518 | 728 |
| 520 | 955  | 520 | 892  | 520 | 639 |
| 522 | 849  | 522 | 913  | 522 | 642 |
| 524 | 824  | 524 | 856  | 524 | 617 |
| 527 | 707  | 527 | 794  | 527 | 579 |
| 529 | 763  | 529 | 815  | 529 | 592 |
| 531 | 643  | 531 | 763  | 531 | 524 |
| 533 | 656  | 533 | 783  | 533 | 574 |
| 535 | 641  | 535 | 662  | 535 | 483 |
| 537 | 545  | 537 | 717  | 537 | 428 |
| 540 | 572  | 540 | 682  | 540 | 449 |
| 542 | 648  | 542 | 757  | 542 | 372 |
| 544 | 412  | 544 | 622  | 544 | 380 |
| 546 | 498  | 546 | 623  | 546 | 320 |
| 548 | 472  | 548 | 591  | 548 | 344 |
| 551 | 439  | 551 | 512  | 551 | 295 |
| 553 | 332  | 553 | 542  | 553 | 329 |
| 555 | 289  | 555 | 456  | 555 | 212 |
| 557 | 326  | 557 | 468  | 557 | 256 |
| 559 | 361  | 559 | 412  | 559 | 217 |
| 562 | 251  | 562 | 408  | 562 | 260 |
| 564 | 230  | 564 | 418  | 564 | 240 |
| 566 | 364  | 566 | 424  | 566 | 170 |
| 568 | 351  | 568 | 314  | 568 | 230 |
| 570 | 306  | 570 | 324  | 570 | 174 |
| 572 | 348  | 572 | 298  | 572 | 213 |
| 575 | 323  | 575 | 265  | 575 | 198 |
| 577 | 263  | 577 | 267  | 577 | 160 |
| 579 | 323  | 579 | 335  | 579 | 238 |
| 581 | 324  | 581 | 329  | 581 | 243 |
| 583 | 342  | 583 | 295  | 583 | 181 |

|     |     |     |     |     |     |
|-----|-----|-----|-----|-----|-----|
| 586 | 289 | 586 | 324 | 586 | 165 |
| 588 | 331 | 588 | 312 | 588 | 213 |
| 590 | 202 | 590 | 349 | 590 | 176 |
| 592 | 343 | 592 | 287 | 592 | 146 |
| 594 | 326 | 594 | 271 | 594 | 175 |
| 596 | 349 | 596 | 334 | 596 | 189 |
| 599 | 167 | 599 | 268 | 599 | 185 |
| 601 | 273 | 601 | 306 | 601 | 182 |
| 603 | 222 | 603 | 226 | 603 | 138 |
| 605 | 229 | 605 | 383 | 605 | 111 |
| 607 | 312 | 607 | 259 | 607 | 201 |
| 609 | 325 | 609 | 273 | 609 | 205 |
| 612 | 233 | 612 | 276 | 612 | 197 |
| 614 | 254 | 614 | 221 | 614 | 150 |
| 616 | 192 | 616 | 182 | 616 | 119 |
| 618 | 163 | 618 | 229 | 618 | 153 |
| 620 | 129 | 620 | 203 | 620 | 147 |
| 623 | 200 | 623 | 193 | 623 | 104 |
| 625 | 129 | 625 | 186 | 625 | 125 |
| 627 | 184 | 627 | 185 | 627 | 129 |
| 629 | 201 | 629 | 170 | 629 | 140 |
| 631 | 45  | 631 | 166 | 631 | 15  |
| 633 | 99  | 633 | 86  | 633 | 38  |
| 636 | -49 | 636 | 79  | 636 | 52  |
| 638 | 86  | 638 | -14 | 638 | 11  |
| 640 | 65  | 640 | 136 | 640 | -16 |
| 642 | 83  | 642 | 123 | 642 | 21  |
| 644 | 27  | 644 | 57  | 644 | 27  |
| 646 | 107 | 646 | 43  | 646 | -6  |
| 649 | 36  | 649 | 90  | 649 | -18 |
| 651 | 78  | 651 | 118 | 651 | 13  |
| 653 | 21  | 653 | 128 | 653 | -15 |
| 655 | 0   | 655 | 129 | 655 | 21  |

|     |      |     |     |     |     |
|-----|------|-----|-----|-----|-----|
| 657 | -123 | 657 | 96  | 657 | -12 |
| 659 | 12   | 659 | 239 | 659 | -26 |
| 662 | 87   | 662 | 218 | 662 | 16  |
| 664 | 21   | 664 | 295 | 664 | 16  |
| 666 | 101  | 666 | 362 | 666 | 2   |
| 668 | 16   | 668 | 404 | 668 | 44  |
| 670 | 109  | 670 | 522 | 670 | 10  |
| 672 | 62   | 672 | 512 | 672 | 4   |
| 674 | 25   | 674 | 537 | 674 | 14  |
| 677 | 84   | 677 | 518 | 677 | 45  |
| 679 | 56   | 679 | 453 | 679 | 60  |
| 681 | 61   | 681 | 474 | 681 | 77  |
| 683 | 19   | 683 | 428 | 683 | 89  |
| 685 | 218  | 685 | 336 | 685 | 93  |
| 687 | 164  | 687 | 321 | 687 | 95  |
| 690 | 161  | 690 | 292 | 690 | 176 |
| 692 | 95   | 692 | 197 | 692 | 68  |
| 694 | 188  | 694 | 272 | 694 | 73  |
| 696 | 165  | 696 | 250 | 696 | 165 |
| 698 | 78   | 698 | 237 | 698 | 167 |
| 700 | 183  | 700 | 235 | 700 | 152 |
| 702 | 111  | 702 | 222 | 702 | 110 |
| 705 | 287  | 705 | 176 | 705 | 158 |
| 707 | 72   | 707 | 147 | 707 | 174 |
| 709 | 177  | 709 | 158 | 709 | 139 |
| 711 | 74   | 711 | 73  | 711 | 78  |
| 713 | 160  | 713 | 131 | 713 | 111 |
| 715 | 146  | 715 | 86  | 715 | 120 |
| 718 | 69   | 718 | 151 | 718 | 124 |
| 720 | 14   | 720 | 86  | 720 | 149 |
| 722 | 80   | 722 | 108 | 722 | 127 |
| 724 | 105  | 724 | 60  | 724 | 99  |
| 726 | 164  | 726 | 51  | 726 | 64  |

|     |     |     |     |     |     |
|-----|-----|-----|-----|-----|-----|
| 728 | 64  | 728 | 62  | 728 | 141 |
| 730 | 26  | 730 | 45  | 730 | 91  |
| 733 | 72  | 733 | 7   | 733 | 150 |
| 735 | 56  | 735 | -33 | 735 | 183 |
| 737 | 36  | 737 | -34 | 737 | 160 |
| 739 | -66 | 739 | -25 | 739 | 212 |
| 741 | 126 | 741 | -2  | 741 | 143 |
| 743 | 20  | 743 | -48 | 743 | 125 |
| 745 | 56  | 745 | 38  | 745 | 135 |
| 748 | 106 | 748 | -26 | 748 | 201 |
| 750 | 16  | 750 | 33  | 750 | 149 |
| 752 | 107 | 752 | -25 | 752 | 128 |
| 754 | 17  | 754 | 26  | 754 | 234 |
| 756 | 181 | 756 | -17 | 756 | 216 |
| 758 | 75  | 758 | -31 | 758 | 187 |
| 760 | 134 | 760 | 71  | 760 | 218 |
| 762 | 198 | 762 | -16 | 762 | 235 |
| 765 | 212 | 765 | 105 | 765 | 253 |
| 767 | 119 | 767 | 138 | 767 | 266 |
| 769 | 139 | 769 | 84  | 769 | 256 |
| 771 | 83  | 771 | 188 | 771 | 217 |
| 773 | 168 | 773 | 163 | 773 | 285 |
| 775 | 228 | 775 | 201 | 775 | 292 |
| 777 | 276 | 777 | 228 | 777 | 288 |
| 780 | 253 | 780 | 200 | 780 | 271 |
| 782 | 227 | 782 | 286 | 782 | 326 |
| 784 | 383 | 784 | 303 | 784 | 388 |
| 786 | 307 | 786 | 253 | 786 | 317 |
| 788 | 293 | 788 | 336 | 788 | 344 |
| 790 | 208 | 790 | 340 | 790 | 395 |
| 792 | 237 | 792 | 385 | 792 | 401 |
| 794 | 296 | 794 | 370 | 794 | 325 |
| 797 | 302 | 797 | 384 | 797 | 410 |

|     |     |     |      |     |     |
|-----|-----|-----|------|-----|-----|
| 799 | 280 | 799 | 397  | 799 | 377 |
| 801 | 338 | 801 | 453  | 801 | 362 |
| 803 | 377 | 803 | 528  | 803 | 399 |
| 805 | 262 | 805 | 611  | 805 | 350 |
| 807 | 243 | 807 | 666  | 807 | 320 |
| 809 | 240 | 809 | 754  | 809 | 332 |
| 811 | 223 | 811 | 1002 | 811 | 374 |
| 814 | 369 | 814 | 1095 | 814 | 363 |
| 816 | 255 | 816 | 1200 | 816 | 352 |
| 818 | 256 | 818 | 1352 | 818 | 321 |
| 820 | 230 | 820 | 1230 | 820 | 311 |
| 822 | 194 | 822 | 1199 | 822 | 269 |
| 824 | 118 | 824 | 1079 | 824 | 237 |
| 826 | 109 | 826 | 1009 | 826 | 237 |
| 828 | 103 | 828 | 908  | 828 | 252 |
| 831 | 38  | 831 | 929  | 831 | 236 |
| 833 | 45  | 833 | 976  | 833 | 241 |
| 835 | 127 | 835 | 1045 | 835 | 199 |
| 837 | 149 | 837 | 1256 | 837 | 181 |
| 839 | 101 | 839 | 1408 | 839 | 222 |
| 841 | 104 | 841 | 1618 | 841 | 129 |
| 843 | 150 | 843 | 1816 | 843 | 176 |
| 845 | 124 | 845 | 1909 | 845 | 129 |
| 848 | 110 | 848 | 1982 | 848 | 167 |
| 850 | 52  | 850 | 2000 | 850 | 139 |
| 852 | 65  | 852 | 1941 | 852 | 151 |
| 854 | 93  | 854 | 1809 | 854 | 161 |
| 856 | 24  | 856 | 1729 | 856 | 191 |
| 858 | 69  | 858 | 1631 | 858 | 165 |
| 860 | 102 | 860 | 1465 | 860 | 185 |
| 862 | -21 | 862 | 1321 | 862 | 143 |
| 864 | 59  | 864 | 1228 | 864 | 107 |
| 867 | 121 | 867 | 1078 | 867 | 186 |



|     |     |     |      |     |     |
|-----|-----|-----|------|-----|-----|
| 869 | 59  | 869 | 952  | 869 | 153 |
| 871 | 97  | 871 | 755  | 871 | 179 |
| 873 | 78  | 873 | 535  | 873 | 202 |
| 875 | 104 | 875 | 461  | 875 | 253 |
| 877 | -1  | 877 | 385  | 877 | 205 |
| 879 | 76  | 879 | 174  | 879 | 233 |
| 881 | 162 | 881 | 183  | 881 | 224 |
| 883 | 178 | 883 | 121  | 883 | 237 |
| 886 | 72  | 886 | 129  | 886 | 272 |
| 888 | 236 | 888 | 131  | 888 | 342 |
| 890 | 218 | 890 | 106  | 890 | 324 |
| 892 | 228 | 892 | 195  | 892 | 293 |
| 894 | 309 | 894 | 161  | 894 | 327 |
| 896 | 213 | 896 | 194  | 896 | 322 |
| 898 | 291 | 898 | 320  | 898 | 352 |
| 900 | 297 | 900 | 384  | 900 | 422 |
| 902 | 247 | 902 | 473  | 902 | 335 |
| 904 | 236 | 904 | 547  | 904 | 466 |
| 907 | 318 | 907 | 659  | 907 | 504 |
| 909 | 389 | 909 | 809  | 909 | 465 |
| 911 | 328 | 911 | 846  | 911 | 435 |
| 913 | 310 | 913 | 929  | 913 | 478 |
| 915 | 443 | 915 | 976  | 915 | 477 |
| 917 | 358 | 917 | 1003 | 917 | 469 |
| 919 | 290 | 919 | 980  | 919 | 471 |
| 921 | 362 | 921 | 1047 | 921 | 485 |
| 923 | 362 | 923 | 1007 | 923 | 465 |
| 925 | 470 | 925 | 986  | 925 | 474 |
| 928 | 381 | 928 | 899  | 928 | 419 |
| 930 | 329 | 930 | 753  | 930 | 450 |
| 932 | 349 | 932 | 655  | 932 | 366 |
| 934 | 337 | 934 | 447  | 934 | 375 |
| 936 | 323 | 936 | 322  | 936 | 417 |

|      |     |      |     |      |     |
|------|-----|------|-----|------|-----|
| 938  | 333 | 938  | 198 | 938  | 403 |
| 940  | 292 | 940  | 132 | 940  | 367 |
| 942  | 252 | 942  | 90  | 942  | 372 |
| 944  | 376 | 944  | 56  | 944  | 377 |
| 946  | 222 | 946  | 96  | 946  | 378 |
| 949  | 150 | 949  | -10 | 949  | 360 |
| 951  | 268 | 951  | 83  | 951  | 307 |
| 953  | 275 | 953  | -15 | 953  | 302 |
| 955  | 205 | 955  | 0   | 955  | 298 |
| 957  | 266 | 957  | 7   | 957  | 280 |
| 959  | 238 | 959  | 13  | 959  | 276 |
| 961  | 233 | 961  | 0   | 961  | 303 |
| 963  | 177 | 963  | 67  | 963  | 301 |
| 965  | 201 | 965  | 154 | 965  | 248 |
| 967  | 185 | 967  | 134 | 967  | 271 |
| 969  | 135 | 969  | 199 | 969  | 275 |
| 971  | 272 | 971  | 221 | 971  | 261 |
| 974  | 194 | 974  | 234 | 974  | 231 |
| 976  | 248 | 976  | 367 | 976  | 257 |
| 978  | 274 | 978  | 310 | 978  | 216 |
| 980  | 225 | 980  | 271 | 980  | 244 |
| 982  | 252 | 982  | 165 | 982  | 189 |
| 984  | 158 | 984  | 171 | 984  | 225 |
| 986  | 283 | 986  | 194 | 986  | 178 |
| 988  | 165 | 988  | 168 | 988  | 176 |
| 990  | 273 | 990  | 213 | 990  | 177 |
| 992  | 155 | 992  | 197 | 992  | 145 |
| 994  | 246 | 994  | 210 | 994  | 151 |
| 996  | 324 | 996  | 240 | 996  | 125 |
| 999  | 299 | 999  | 280 | 999  | 158 |
| 1001 | 305 | 1001 | 319 | 1001 | 132 |
| 1003 | 240 | 1003 | 267 | 1003 | 129 |
| 1005 | 297 | 1005 | 316 | 1005 | 90  |

|      |     |      |      |      |     |
|------|-----|------|------|------|-----|
| 1007 | 302 | 1007 | 255  | 1007 | 87  |
| 1009 | 211 | 1009 | 207  | 1009 | 43  |
| 1011 | 264 | 1011 | 250  | 1011 | 27  |
| 1013 | 204 | 1013 | 272  | 1013 | 75  |
| 1015 | 165 | 1015 | 201  | 1015 | 69  |
| 1017 | 145 | 1017 | 217  | 1017 | 30  |
| 1019 | 167 | 1019 | 259  | 1019 | 43  |
| 1021 | 114 | 1021 | 397  | 1021 | 22  |
| 1023 | 96  | 1023 | 421  | 1023 | 18  |
| 1026 | 136 | 1026 | 397  | 1026 | 0   |
| 1028 | 92  | 1028 | 604  | 1028 | 28  |
| 1030 | 20  | 1030 | 682  | 1030 | -13 |
| 1032 | -68 | 1032 | 817  | 1032 | 29  |
| 1034 | 33  | 1034 | 1028 | 1034 | 0   |
| 1036 | -36 | 1036 | 1204 | 1036 | 28  |
| 1038 | 53  | 1038 | 1397 | 1038 | -12 |
| 1040 | 9   | 1040 | 1594 | 1040 | 24  |
| 1042 | 42  | 1042 | 1850 | 1042 | 54  |
| 1044 | -57 | 1044 | 1990 | 1044 | 10  |
| 1046 | 64  | 1046 | 2055 | 1046 | 49  |
| 1048 | 33  | 1048 | 2069 | 1048 | 33  |
| 1050 | 33  | 1050 | 2127 | 1050 | 71  |
| 1052 | -14 | 1052 | 2091 | 1052 | 37  |
| 1055 | 120 | 1055 | 2208 | 1055 | 65  |
| 1057 | 84  | 1057 | 2160 | 1057 | 98  |
| 1059 | 156 | 1059 | 2284 | 1059 | 110 |
| 1061 | 169 | 1061 | 2203 | 1061 | 57  |
| 1063 | 213 | 1063 | 2078 | 1063 | 77  |
| 1065 | 276 | 1065 | 2005 | 1065 | 117 |
| 1067 | 196 | 1067 | 1889 | 1067 | 123 |
| 1069 | 208 | 1069 | 1750 | 1069 | 127 |
| 1071 | 147 | 1071 | 1681 | 1071 | 110 |
| 1073 | 171 | 1073 | 1583 | 1073 | 103 |

|      |     |      |      |      |     |
|------|-----|------|------|------|-----|
| 1075 | 210 | 1075 | 1519 | 1075 | 142 |
| 1077 | 172 | 1077 | 1532 | 1077 | 138 |
| 1079 | 157 | 1079 | 1415 | 1079 | 160 |
| 1081 | 182 | 1081 | 1405 | 1081 | 138 |
| 1083 | 186 | 1083 | 1407 | 1083 | 117 |
| 1085 | 234 | 1085 | 1367 | 1085 | 145 |
| 1088 | 180 | 1088 | 1380 | 1088 | 199 |
| 1090 | 125 | 1090 | 1401 | 1090 | 183 |
| 1092 | 162 | 1092 | 1447 | 1092 | 146 |
| 1094 | 189 | 1094 | 1467 | 1094 | 175 |
| 1096 | 251 | 1096 | 1429 | 1096 | 99  |
| 1098 | 159 | 1098 | 1415 | 1098 | 127 |
| 1100 | 172 | 1100 | 1466 | 1100 | 159 |
| 1102 | 327 | 1102 | 1484 | 1102 | 205 |
| 1104 | 267 | 1104 | 1475 | 1104 | 183 |
| 1106 | 279 | 1106 | 1620 | 1106 | 160 |
| 1108 | 331 | 1108 | 1577 | 1108 | 185 |
| 1110 | 231 | 1110 | 1571 | 1110 | 185 |
| 1112 | 251 | 1112 | 1602 | 1112 | 190 |
| 1114 | 321 | 1114 | 1516 | 1114 | 200 |
| 1116 | 249 | 1116 | 1454 | 1116 | 148 |
| 1118 | 302 | 1118 | 1303 | 1118 | 172 |
| 1120 | 309 | 1120 | 1133 | 1120 | 169 |
| 1122 | 191 | 1122 | 1066 | 1122 | 121 |
| 1125 | 267 | 1125 | 862  | 1125 | 164 |
| 1127 | 219 | 1127 | 708  | 1127 | 204 |
| 1129 | 264 | 1129 | 589  | 1129 | 150 |
| 1131 | 191 | 1131 | 482  | 1131 | 155 |
| 1133 | 198 | 1133 | 449  | 1133 | 167 |
| 1135 | 174 | 1135 | 344  | 1135 | 136 |
| 1137 | 151 | 1137 | 247  | 1137 | 80  |
| 1139 | 189 | 1139 | 241  | 1139 | 132 |
| 1141 | 32  | 1141 | 214  | 1141 | 76  |

|      |     |      |     |      |     |
|------|-----|------|-----|------|-----|
| 1143 | 98  | 1143 | 157 | 1143 | 99  |
| 1145 | 158 | 1145 | 155 | 1145 | 64  |
| 1147 | 32  | 1147 | 141 | 1147 | 99  |
| 1149 | 95  | 1149 | 91  | 1149 | 45  |
| 1151 | 163 | 1151 | 120 | 1151 | 75  |
| 1153 | 95  | 1153 | 64  | 1153 | 71  |
| 1155 | 14  | 1155 | 51  | 1155 | 20  |
| 1157 | -4  | 1157 | 118 | 1157 | 0   |
| 1159 | 91  | 1159 | 31  | 1159 | 9   |
| 1161 | 11  | 1161 | 69  | 1161 | 54  |
| 1163 | 83  | 1163 | 66  | 1163 | 77  |
| 1165 | 109 | 1165 | 101 | 1165 | 34  |
| 1167 | -34 | 1167 | -10 | 1167 | 20  |
| 1170 | 31  | 1170 | 4   | 1170 | 4   |
| 1172 | 20  | 1172 | 21  | 1172 | 6   |
| 1174 | 9   | 1174 | -19 | 1174 | 7   |
| 1176 | 29  | 1176 | -13 | 1176 | -17 |
| 1178 | -61 | 1178 | -6  | 1178 | 2   |
| 1180 | 61  | 1180 | 1   | 1180 | -1  |
| 1182 | -12 | 1182 | 40  | 1182 | 6   |
| 1184 | 4   | 1184 | -25 | 1184 | -11 |
| 1186 | -23 | 1186 | 72  | 1186 | -37 |
| 1188 | -1  | 1188 | 74  | 1188 | 6   |
| 1190 | -21 | 1190 | 132 | 1190 | 22  |
| 1192 | -35 | 1192 | 244 | 1192 | 31  |
| 1194 | 92  | 1194 | 220 | 1194 | -25 |
| 1196 | 75  | 1196 | 324 | 1196 | 31  |
| 1198 | 48  | 1198 | 298 | 1198 | 15  |
| 1200 | 9   | 1200 | 334 | 1200 | 36  |
| 1202 | 69  | 1202 | 373 | 1202 | -3  |
| 1204 | 56  | 1204 | 448 | 1204 | 22  |
| 1206 | 104 | 1206 | 548 | 1206 | 37  |
| 1208 | -51 | 1208 | 516 | 1208 | 41  |

|      |     |      |      |      |     |
|------|-----|------|------|------|-----|
| 1210 | 144 | 1210 | 553  | 1210 | 31  |
| 1212 | 147 | 1212 | 608  | 1212 | 36  |
| 1214 | 130 | 1214 | 648  | 1214 | 82  |
| 1216 | 167 | 1216 | 642  | 1216 | 72  |
| 1218 | 72  | 1218 | 712  | 1218 | 84  |
| 1220 | 86  | 1220 | 709  | 1220 | 16  |
| 1222 | 147 | 1222 | 729  | 1222 | 50  |
| 1224 | 137 | 1224 | 768  | 1224 | 116 |
| 1226 | 183 | 1226 | 832  | 1226 | 25  |
| 1228 | 142 | 1228 | 828  | 1228 | 75  |
| 1230 | 226 | 1230 | 892  | 1230 | 87  |
| 1233 | 180 | 1233 | 916  | 1233 | 58  |
| 1235 | 236 | 1235 | 918  | 1235 | 87  |
| 1237 | 260 | 1237 | 1082 | 1237 | 105 |
| 1239 | 231 | 1239 | 1103 | 1239 | 124 |
| 1241 | 221 | 1241 | 1107 | 1241 | 96  |
| 1243 | 169 | 1243 | 1146 | 1243 | 104 |
| 1245 | 206 | 1245 | 1153 | 1245 | 122 |
| 1247 | 189 | 1247 | 1234 | 1247 | 84  |
| 1249 | 121 | 1249 | 1320 | 1249 | 99  |
| 1251 | 210 | 1251 | 1296 | 1251 | 128 |
| 1253 | 256 | 1253 | 1294 | 1253 | 122 |
| 1255 | 179 | 1255 | 1414 | 1255 | 132 |
| 1257 | 209 | 1257 | 1308 | 1257 | 92  |
| 1259 | 295 | 1259 | 1317 | 1259 | 142 |
| 1261 | 226 | 1261 | 1329 | 1261 | 77  |
| 1263 | 156 | 1263 | 1338 | 1263 | 110 |
| 1265 | 259 | 1265 | 1309 | 1265 | 121 |
| 1267 | 212 | 1267 | 1395 | 1267 | 133 |
| 1269 | 289 | 1269 | 1289 | 1269 | 118 |
| 1271 | 246 | 1271 | 1353 | 1271 | 125 |
| 1273 | 196 | 1273 | 1331 | 1273 | 64  |
| 1275 | 257 | 1275 | 1331 | 1275 | 99  |

|      |     |      |      |      |     |
|------|-----|------|------|------|-----|
| 1277 | 244 | 1277 | 1275 | 1277 | 43  |
| 1279 | 221 | 1279 | 1243 | 1279 | 66  |
| 1281 | 249 | 1281 | 1144 | 1281 | 113 |
| 1283 | 203 | 1283 | 1143 | 1283 | 134 |
| 1285 | 261 | 1285 | 1118 | 1285 | 86  |
| 1287 | 201 | 1287 | 1089 | 1287 | 38  |
| 1289 | 183 | 1289 | 1042 | 1289 | 83  |
| 1291 | 194 | 1291 | 1087 | 1291 | 109 |
| 1293 | 263 | 1293 | 1014 | 1293 | 120 |
| 1295 | 135 | 1295 | 1001 | 1295 | 76  |
| 1297 | 167 | 1297 | 940  | 1297 | 92  |
| 1299 | 210 | 1299 | 995  | 1299 | 65  |
| 1301 | 216 | 1301 | 917  | 1301 | 80  |
| 1303 | 173 | 1303 | 967  | 1303 | 87  |
| 1305 | 266 | 1305 | 999  | 1305 | 44  |
| 1307 | 272 | 1307 | 966  | 1307 | 113 |
| 1309 | 268 | 1309 | 948  | 1309 | 115 |
| 1311 | 213 | 1311 | 1023 | 1311 | 115 |
| 1313 | 319 | 1313 | 999  | 1313 | 126 |
| 1315 | 319 | 1315 | 1017 | 1315 | 118 |
| 1317 | 245 | 1317 | 1037 | 1317 | 122 |
| 1319 | 262 | 1319 | 1073 | 1319 | 128 |
| 1321 | 283 | 1321 | 1027 | 1321 | 118 |
| 1323 | 287 | 1323 | 1072 | 1323 | 128 |
| 1325 | 253 | 1325 | 1100 | 1325 | 141 |
| 1327 | 287 | 1327 | 1010 | 1327 | 116 |
| 1329 | 333 | 1329 | 1047 | 1329 | 144 |
| 1331 | 302 | 1331 | 1014 | 1331 | 150 |
| 1333 | 289 | 1333 | 1005 | 1333 | 147 |
| 1335 | 387 | 1335 | 1088 | 1335 | 142 |
| 1337 | 419 | 1337 | 1075 | 1337 | 165 |
| 1339 | 369 | 1339 | 1060 | 1339 | 160 |
| 1341 | 402 | 1341 | 1057 | 1341 | 198 |

|      |     |      |      |      |     |
|------|-----|------|------|------|-----|
| 1343 | 433 | 1343 | 1116 | 1343 | 181 |
| 1345 | 338 | 1345 | 1128 | 1345 | 206 |
| 1347 | 421 | 1347 | 1220 | 1347 | 187 |
| 1349 | 502 | 1349 | 1314 | 1349 | 200 |
| 1351 | 498 | 1351 | 1337 | 1351 | 246 |
| 1353 | 449 | 1353 | 1325 | 1353 | 209 |
| 1355 | 510 | 1355 | 1304 | 1355 | 216 |
| 1357 | 468 | 1357 | 1318 | 1357 | 217 |
| 1359 | 567 | 1359 | 1300 | 1359 | 198 |
| 1361 | 601 | 1361 | 1330 | 1361 | 202 |
| 1363 | 492 | 1363 | 1258 | 1363 | 249 |
| 1365 | 559 | 1365 | 1261 | 1365 | 219 |
| 1367 | 624 | 1367 | 1305 | 1367 | 261 |
| 1369 | 524 | 1369 | 1214 | 1369 | 247 |
| 1371 | 578 | 1371 | 1292 | 1371 | 247 |
| 1373 | 591 | 1373 | 1329 | 1373 | 278 |
| 1375 | 628 | 1375 | 1325 | 1375 | 281 |
| 1377 | 507 | 1377 | 1292 | 1377 | 252 |
| 1379 | 520 | 1379 | 1258 | 1379 | 286 |
| 1381 | 477 | 1381 | 1272 | 1381 | 290 |
| 1383 | 502 | 1383 | 1225 | 1383 | 267 |
| 1385 | 555 | 1385 | 1293 | 1385 | 265 |
| 1387 | 579 | 1387 | 1244 | 1387 | 254 |
| 1389 | 573 | 1389 | 1249 | 1389 | 332 |
| 1391 | 551 | 1391 | 1195 | 1391 | 303 |
| 1393 | 499 | 1393 | 1317 | 1393 | 280 |
| 1395 | 589 | 1395 | 1256 | 1395 | 341 |
| 1397 | 539 | 1397 | 1148 | 1397 | 292 |
| 1399 | 574 | 1399 | 1270 | 1399 | 302 |
| 1401 | 426 | 1401 | 1234 | 1401 | 345 |
| 1403 | 511 | 1403 | 1200 | 1403 | 319 |
| 1405 | 542 | 1405 | 1201 | 1405 | 325 |
| 1407 | 509 | 1407 | 1241 | 1407 | 315 |



|      |     |      |      |      |     |
|------|-----|------|------|------|-----|
| 1409 | 475 | 1409 | 1203 | 1409 | 310 |
| 1411 | 516 | 1411 | 1218 | 1411 | 363 |
| 1413 | 551 | 1413 | 1129 | 1413 | 332 |
| 1415 | 495 | 1415 | 1134 | 1415 | 322 |
| 1417 | 515 | 1417 | 1169 | 1417 | 323 |
| 1419 | 426 | 1419 | 1101 | 1419 | 307 |
| 1421 | 551 | 1421 | 1125 | 1421 | 290 |
| 1423 | 525 | 1423 | 1145 | 1423 | 337 |
| 1425 | 569 | 1425 | 1068 | 1425 | 261 |
| 1427 | 432 | 1427 | 1107 | 1427 | 323 |
| 1429 | 535 | 1429 | 1115 | 1429 | 350 |
| 1431 | 537 | 1431 | 1015 | 1431 | 348 |
| 1433 | 579 | 1433 | 1081 | 1433 | 311 |
| 1435 | 476 | 1435 | 1036 | 1435 | 329 |
| 1437 | 525 | 1437 | 1024 | 1437 | 316 |
| 1439 | 473 | 1439 | 1038 | 1439 | 343 |
| 1441 | 470 | 1441 | 1006 | 1441 | 309 |
| 1443 | 514 | 1443 | 1077 | 1443 | 278 |
| 1445 | 501 | 1445 | 1120 | 1445 | 330 |
| 1446 | 575 | 1446 | 1251 | 1446 | 339 |
| 1448 | 541 | 1448 | 1394 | 1448 | 312 |
| 1450 | 436 | 1450 | 1595 | 1450 | 340 |
| 1452 | 505 | 1452 | 1829 | 1452 | 310 |
| 1454 | 464 | 1454 | 2141 | 1454 | 341 |
| 1456 | 560 | 1456 | 2351 | 1456 | 372 |
| 1458 | 636 | 1458 | 2589 | 1458 | 377 |
| 1460 | 552 | 1460 | 2813 | 1460 | 395 |
| 1462 | 608 | 1462 | 2948 | 1462 | 398 |
| 1464 | 629 | 1464 | 2996 | 1464 | 371 |
| 1466 | 553 | 1466 | 2991 | 1466 | 371 |
| 1468 | 584 | 1468 | 2877 | 1468 | 392 |
| 1470 | 580 | 1470 | 2727 | 1470 | 350 |
| 1472 | 574 | 1472 | 2501 | 1472 | 412 |

|      |      |      |      |      |     |
|------|------|------|------|------|-----|
| 1474 | 497  | 1474 | 2226 | 1474 | 401 |
| 1476 | 555  | 1476 | 1925 | 1476 | 397 |
| 1478 | 546  | 1478 | 1710 | 1478 | 406 |
| 1480 | 508  | 1480 | 1528 | 1480 | 413 |
| 1482 | 605  | 1482 | 1330 | 1482 | 443 |
| 1484 | 611  | 1484 | 1173 | 1484 | 461 |
| 1486 | 646  | 1486 | 1016 | 1486 | 459 |
| 1488 | 558  | 1488 | 929  | 1488 | 381 |
| 1490 | 684  | 1490 | 842  | 1490 | 478 |
| 1492 | 654  | 1492 | 918  | 1492 | 444 |
| 1494 | 636  | 1494 | 926  | 1494 | 470 |
| 1496 | 618  | 1496 | 818  | 1496 | 464 |
| 1498 | 752  | 1498 | 839  | 1498 | 467 |
| 1500 | 749  | 1500 | 915  | 1500 | 530 |
| 1502 | 728  | 1502 | 817  | 1502 | 517 |
| 1504 | 738  | 1504 | 841  | 1504 | 523 |
| 1506 | 654  | 1506 | 829  | 1506 | 538 |
| 1507 | 804  | 1507 | 840  | 1507 | 551 |
| 1509 | 700  | 1509 | 832  | 1509 | 583 |
| 1511 | 830  | 1511 | 826  | 1511 | 536 |
| 1513 | 788  | 1513 | 893  | 1513 | 612 |
| 1515 | 812  | 1515 | 830  | 1515 | 660 |
| 1517 | 778  | 1517 | 885  | 1517 | 629 |
| 1519 | 858  | 1519 | 973  | 1519 | 632 |
| 1521 | 865  | 1521 | 968  | 1521 | 666 |
| 1523 | 859  | 1523 | 951  | 1523 | 701 |
| 1525 | 916  | 1525 | 987  | 1525 | 704 |
| 1527 | 907  | 1527 | 956  | 1527 | 760 |
| 1529 | 825  | 1529 | 1040 | 1529 | 755 |
| 1531 | 984  | 1531 | 976  | 1531 | 784 |
| 1533 | 970  | 1533 | 1078 | 1533 | 746 |
| 1535 | 1031 | 1535 | 1062 | 1535 | 784 |
| 1537 | 983  | 1537 | 1058 | 1537 | 811 |

|      |      |      |      |      |      |
|------|------|------|------|------|------|
| 1539 | 1050 | 1539 | 1122 | 1539 | 857  |
| 1541 | 958  | 1541 | 1021 | 1541 | 839  |
| 1543 | 1111 | 1543 | 1172 | 1543 | 870  |
| 1545 | 1140 | 1545 | 1100 | 1545 | 926  |
| 1547 | 1146 | 1547 | 1182 | 1547 | 965  |
| 1549 | 1148 | 1549 | 1203 | 1549 | 943  |
| 1551 | 1131 | 1551 | 1199 | 1551 | 1037 |
| 1552 | 1168 | 1552 | 1270 | 1552 | 998  |
| 1554 | 1163 | 1554 | 1288 | 1554 | 1077 |
| 1556 | 1334 | 1556 | 1299 | 1556 | 1077 |
| 1558 | 1292 | 1558 | 1325 | 1558 | 1122 |
| 1560 | 1428 | 1560 | 1323 | 1560 | 1117 |
| 1562 | 1329 | 1562 | 1412 | 1562 | 1138 |
| 1564 | 1320 | 1564 | 1492 | 1564 | 1183 |
| 1566 | 1369 | 1566 | 1437 | 1566 | 1297 |
| 1568 | 1505 | 1568 | 1527 | 1568 | 1308 |
| 1570 | 1500 | 1570 | 1499 | 1570 | 1324 |
| 1572 | 1527 | 1572 | 1575 | 1572 | 1418 |
| 1574 | 1587 | 1574 | 1650 | 1574 | 1417 |
| 1576 | 1697 | 1576 | 1712 | 1576 | 1499 |
| 1578 | 1799 | 1578 | 1718 | 1578 | 1504 |
| 1580 | 1773 | 1580 | 1735 | 1580 | 1587 |
| 1582 | 1819 | 1582 | 1868 | 1582 | 1617 |
| 1584 | 1908 | 1584 | 1916 | 1584 | 1697 |
| 1586 | 1970 | 1586 | 1964 | 1586 | 1756 |
| 1588 | 2001 | 1588 | 1986 | 1588 | 1814 |
| 1589 | 2049 | 1589 | 2063 | 1589 | 1846 |
| 1591 | 2150 | 1591 | 2252 | 1591 | 1911 |
| 1593 | 2219 | 1593 | 2227 | 1593 | 1964 |
| 1595 | 2304 | 1595 | 2312 | 1595 | 2108 |
| 1597 | 2458 | 1597 | 2391 | 1597 | 2160 |
| 1599 | 2454 | 1599 | 2546 | 1599 | 2227 |
| 1601 | 2560 | 1601 | 2561 | 1601 | 2310 |

|      |      |      |      |      |      |
|------|------|------|------|------|------|
| 1603 | 2546 | 1603 | 2592 | 1603 | 2361 |
| 1605 | 2671 | 1605 | 2707 | 1605 | 2428 |
| 1607 | 2674 | 1607 | 2864 | 1607 | 2485 |
| 1609 | 2768 | 1609 | 2899 | 1609 | 2557 |
| 1611 | 2897 | 1611 | 2912 | 1611 | 2616 |
| 1613 | 2931 | 1613 | 3024 | 1613 | 2684 |
| 1615 | 3036 | 1615 | 3058 | 1615 | 2811 |
| 1617 | 3102 | 1617 | 3175 | 1617 | 2876 |
| 1619 | 3140 | 1619 | 3208 | 1619 | 2901 |
| 1620 | 3238 | 1620 | 3233 | 1620 | 2910 |
| 1622 | 3285 | 1622 | 3322 | 1622 | 3033 |
| 1624 | 3287 | 1624 | 3316 | 1624 | 3080 |
| 1626 | 3360 | 1626 | 3317 | 1626 | 3129 |
| 1628 | 3486 | 1628 | 3333 | 1628 | 3196 |
| 1630 | 3431 | 1630 | 3445 | 1630 | 3208 |
| 1632 | 3485 | 1632 | 3444 | 1632 | 3205 |
| 1634 | 3511 | 1634 | 3451 | 1634 | 3232 |
| 1636 | 3544 | 1636 | 3509 | 1636 | 3214 |
| 1638 | 3374 | 1638 | 3420 | 1638 | 3210 |
| 1640 | 3545 | 1640 | 3440 | 1640 | 3168 |
| 1642 | 3509 | 1642 | 3399 | 1642 | 3218 |
| 1644 | 3392 | 1644 | 3342 | 1644 | 3209 |
| 1646 | 3409 | 1646 | 3328 | 1646 | 3135 |
| 1648 | 3449 | 1648 | 3269 | 1648 | 3099 |
| 1649 | 3320 | 1649 | 3267 | 1649 | 3025 |
| 1651 | 3310 | 1651 | 3251 | 1651 | 3024 |
| 1653 | 3275 | 1653 | 3160 | 1653 | 2998 |
| 1655 | 3154 | 1655 | 3068 | 1655 | 2896 |
| 1657 | 3123 | 1657 | 3076 | 1657 | 2861 |
| 1659 | 2974 | 1659 | 2955 | 1659 | 2835 |
| 1661 | 3018 | 1661 | 2876 | 1661 | 2712 |
| 1663 | 2875 | 1663 | 2792 | 1663 | 2704 |
| 1665 | 2795 | 1665 | 2733 | 1665 | 2613 |

|      |      |      |      |      |      |
|------|------|------|------|------|------|
| 1667 | 2734 | 1667 | 2708 | 1667 | 2577 |
| 1669 | 2736 | 1669 | 2616 | 1669 | 2505 |
| 1671 | 2634 | 1671 | 2578 | 1671 | 2381 |
| 1673 | 2518 | 1673 | 2356 | 1673 | 2378 |
| 1674 | 2446 | 1674 | 2417 | 1674 | 2238 |
| 1676 | 2343 | 1676 | 2295 | 1676 | 2165 |
| 1678 | 2252 | 1678 | 2280 | 1678 | 2080 |
| 1680 | 2257 | 1680 | 2069 | 1680 | 2074 |
| 1682 | 2117 | 1682 | 2015 | 1682 | 1963 |
| 1684 | 2040 | 1684 | 1936 | 1684 | 1893 |
| 1686 | 2016 | 1686 | 1935 | 1686 | 1795 |
| 1688 | 1917 | 1688 | 1825 | 1688 | 1720 |
| 1690 | 1803 | 1690 | 1715 | 1690 | 1679 |
| 1692 | 1708 | 1692 | 1641 | 1692 | 1596 |
| 1694 | 1688 | 1694 | 1575 | 1694 | 1535 |
| 1696 | 1642 | 1696 | 1543 | 1696 | 1457 |
| 1698 | 1522 | 1698 | 1468 | 1698 | 1436 |
| 1699 | 1464 | 1699 | 1337 | 1699 | 1335 |
| 1701 | 1416 | 1701 | 1350 | 1701 | 1297 |
| 1703 | 1344 | 1703 | 1320 | 1703 | 1235 |
| 1705 | 1282 | 1705 | 1205 | 1705 | 1163 |
| 1707 | 1251 | 1707 | 1170 | 1707 | 1093 |
| 1709 | 1269 | 1709 | 1133 | 1709 | 1083 |
| 1711 | 1176 | 1711 | 1091 | 1711 | 1019 |
| 1713 | 1122 | 1713 | 1092 | 1713 | 978  |
| 1715 | 1073 | 1715 | 1075 | 1715 | 912  |
| 1717 | 1041 | 1717 | 940  | 1717 | 877  |
| 1719 | 1016 | 1719 | 889  | 1719 | 814  |
| 1720 | 868  | 1720 | 887  | 1720 | 800  |
| 1722 | 891  | 1722 | 805  | 1722 | 762  |
| 1724 | 909  | 1724 | 745  | 1724 | 675  |
| 1726 | 897  | 1726 | 851  | 1726 | 697  |
| 1728 | 882  | 1728 | 772  | 1728 | 636  |

|      |     |      |     |      |     |
|------|-----|------|-----|------|-----|
| 1730 | 784 | 1730 | 770 | 1730 | 636 |
| 1732 | 723 | 1732 | 742 | 1732 | 624 |
| 1734 | 758 | 1734 | 696 | 1734 | 576 |
| 1736 | 772 | 1736 | 667 | 1736 | 520 |
| 1738 | 698 | 1738 | 657 | 1738 | 554 |
| 1740 | 618 | 1740 | 602 | 1740 | 515 |
| 1742 | 600 | 1742 | 578 | 1742 | 494 |
| 1743 | 605 | 1743 | 635 | 1743 | 439 |
| 1745 | 586 | 1745 | 569 | 1745 | 425 |
| 1747 | 592 | 1747 | 589 | 1747 | 413 |
| 1749 | 597 | 1749 | 494 | 1749 | 404 |
| 1751 | 575 | 1751 | 552 | 1751 | 350 |
| 1753 | 548 | 1753 | 558 | 1753 | 378 |
| 1755 | 604 | 1755 | 401 | 1755 | 352 |
| 1757 | 379 | 1757 | 486 | 1757 | 323 |
| 1759 | 497 | 1759 | 440 | 1759 | 296 |
| 1761 | 453 | 1761 | 458 | 1761 | 288 |
| 1762 | 372 | 1762 | 540 | 1762 | 282 |
| 1764 | 413 | 1764 | 439 | 1764 | 274 |
| 1766 | 354 | 1766 | 373 | 1766 | 256 |
| 1768 | 447 | 1768 | 394 | 1768 | 238 |
| 1770 | 353 | 1770 | 406 | 1770 | 223 |
| 1772 | 322 | 1772 | 364 | 1772 | 212 |
| 1774 | 315 | 1774 | 324 | 1774 | 171 |
| 1776 | 344 | 1776 | 363 | 1776 | 205 |
| 1778 | 258 | 1778 | 339 | 1778 | 179 |
| 1780 | 243 | 1780 | 351 | 1780 | 149 |
| 1781 | 308 | 1781 | 242 | 1781 | 143 |
| 1783 | 297 | 1783 | 235 | 1783 | 165 |
| 1785 | 299 | 1785 | 216 | 1785 | 165 |
| 1787 | 266 | 1787 | 240 | 1787 | 114 |
| 1789 | 161 | 1789 | 258 | 1789 | 133 |
| 1791 | 213 | 1791 | 207 | 1791 | 85  |

|      |     |      |     |      |     |
|------|-----|------|-----|------|-----|
| 1793 | 182 | 1793 | 219 | 1793 | 71  |
| 1795 | 242 | 1795 | 133 | 1795 | 101 |
| 1797 | 138 | 1797 | 107 | 1797 | 49  |
| 1799 | 125 | 1799 | 109 | 1799 | 104 |
| 1800 | 136 | 1800 | 138 | 1800 | 60  |
