# Supplementary material for: Novel diagnostic and therapeutic techniques reveal changed metabolic profiles in recurrent focal segmental glomerulosclerosis
Source: Springer Nature journal article supplement (doi:10.1038/s41598-021-83883-w), 2021-02-25
Supplement: MOESM3 [file 41598_2021_83883_MOESM3_ESM.pdf]

| CTRL serum         |                              | FSGS serum         |                              |
|--------------------|------------------------------|--------------------|------------------------------|
| Raman Shift (cm-1) | Raman intensity (arb. units) | Raman Shift (cm-1) | Raman intensity (arb. units) |
| 351                | -10                          | 351                | -5                           |
| 352                | 3                            | 352                | 6                            |
| 354                | 11                           | 354                | 23                           |
| 356                | 19                           | 356                | 15                           |
| 357                | 58                           | 357                | -2                           |
| 359                | 24                           | 359                | 44                           |
| 360                | 8                            | 360                | 1                            |
| 362                | -1                           | 362                | -1                           |
| 363                | 8                            | 363                | -10                          |
| 365                | -16                          | 365                | 5                            |
| 367                | -2                           | 367                | -11                          |
| 368                | 0                            | 368                | 1                            |
| 370                | 0                            | 370                | -6                           |
| 371                | 20                           | 371                | 3                            |
| 373                | 2                            | 373                | 0                            |
| 374                | -8                           | 374                | -30                          |
| 376                | 13                           | 376                | -33                          |
| 377                | 5                            | 377                | 0                            |
| 379                | -8                           | 379                | 0                            |
| 381                | 18                           | 381                | -3                           |
| 382                | -6                           | 382                | 3                            |
| 384                | 17                           | 384                | -10                          |
| 385                | 24                           | 385                | 25                           |
| 387                | 57                           | 387                | 27                           |
| 388                | 147                          | 388                | 91                           |
| 390                | 143                          | 390                | 184                          |
| 391                | 163                          | 391                | 224                          |
| 393                | 179                          | 393                | 267                          |
| 395                | 233                          | 395                | 299                          |
| 396                | 255                          | 396                | 391                          |
| 398                | 317                          | 398                | 440                          |
| 399                | 384                          | 399                | 530                          |
| 401                | 384                          | 401                | 610                          |
| 402                | 426                          | 402                | 637                          |
| 404                | 435                          | 404                | 672                          |
| 405                | 487                          | 405                | 707                          |
| 407                | 480                          | 407                | 729                          |
| 409                | 460                          | 409                | 726                          |
| 410                | 455                          | 410                | 708                          |
| 412                | 461                          | 412                | 694                          |
| 413                | 437                          | 413                | 709                          |
| 415                | 432                          | 415                | 662                          |
| 416                | 391                          | 416                | 612                          |
| 418                | 372                          | 418                | 575                          |
| 419                | 338                          | 419                | 552                          |
| 421                | 323                          | 421                | 492                          |
| 423                | 287                          | 423                | 464                          |

|     |     |     |     |
|-----|-----|-----|-----|
| 424 | 220 | 424 | 420 |
| 426 | 216 | 426 | 328 |
| 427 | 185 | 427 | 311 |
| 429 | 169 | 429 | 261 |
| 430 | 128 | 430 | 216 |
| 432 | 103 | 432 | 161 |
| 433 | 69  | 433 | 102 |
| 435 | 51  | 435 | 63  |
| 436 | 38  | 436 | 25  |
| 438 | 42  | 438 | -6  |
| 440 | 25  | 440 | 3   |
| 441 | -4  | 441 | -1  |
| 443 | 50  | 443 | -26 |
| 444 | 45  | 444 | 29  |
| 446 | 54  | 446 | 37  |
| 447 | 112 | 447 | 54  |
| 449 | 114 | 449 | 120 |
| 450 | 134 | 450 | 106 |
| 452 | 116 | 452 | 142 |
| 453 | 163 | 453 | 126 |
| 455 | 164 | 455 | 160 |
| 457 | 206 | 457 | 129 |
| 458 | 187 | 458 | 182 |
| 460 | 198 | 460 | 144 |
| 461 | 222 | 461 | 162 |
| 463 | 210 | 463 | 162 |
| 464 | 189 | 464 | 110 |
| 466 | 186 | 466 | 91  |
| 467 | 200 | 467 | 78  |
| 469 | 183 | 469 | 71  |
| 470 | 185 | 470 | 45  |
| 472 | 177 | 472 | 48  |
| 473 | 209 | 474 | 46  |
| 475 | 200 | 475 | 54  |
| 477 | 204 | 477 | 41  |
| 478 | 226 | 478 | 54  |
| 480 | 224 | 480 | 74  |
| 481 | 251 | 481 | 84  |
| 483 | 310 | 483 | 138 |
| 484 | 333 | 484 | 207 |
| 486 | 398 | 486 | 242 |
| 487 | 439 | 487 | 338 |
| 489 | 452 | 489 | 389 |
| 490 | 476 | 490 | 385 |
| 492 | 504 | 492 | 418 |
| 493 | 485 | 494 | 431 |
| 495 | 505 | 495 | 395 |
| 497 | 489 | 497 | 437 |
| 498 | 488 | 498 | 410 |
| 500 | 480 | 500 | 389 |

|     |     |     |     |
|-----|-----|-----|-----|
| 501 | 477 | 501 | 378 |
| 503 | 493 | 503 | 360 |
| 504 | 477 | 504 | 370 |
| 506 | 495 | 506 | 347 |
| 507 | 496 | 507 | 357 |
| 509 | 496 | 509 | 385 |
| 510 | 560 | 510 | 408 |
| 512 | 557 | 512 | 487 |
| 513 | 611 | 513 | 507 |
| 515 | 636 | 515 | 586 |
| 516 | 653 | 517 | 650 |
| 518 | 702 | 518 | 695 |
| 520 | 723 | 520 | 762 |
| 521 | 735 | 521 | 788 |
| 523 | 767 | 523 | 800 |
| 524 | 790 | 524 | 813 |
| 526 | 779 | 526 | 833 |
| 527 | 791 | 527 | 826 |
| 529 | 793 | 529 | 839 |
| 530 | 756 | 530 | 831 |
| 532 | 791 | 532 | 782 |
| 533 | 796 | 533 | 820 |
| 535 | 758 | 535 | 812 |
| 536 | 774 | 536 | 771 |
| 538 | 745 | 538 | 787 |
| 539 | 738 | 539 | 755 |
| 541 | 761 | 541 | 729 |
| 542 | 736 | 542 | 755 |
| 544 | 732 | 544 | 718 |
| 546 | 691 | 546 | 681 |
| 547 | 664 | 547 | 654 |
| 549 | 645 | 549 | 619 |
| 550 | 625 | 550 | 574 |
| 552 | 588 | 552 | 573 |
| 553 | 599 | 553 | 534 |
| 555 | 564 | 555 | 569 |
| 556 | 536 | 556 | 532 |
| 558 | 543 | 558 | 484 |
| 559 | 547 | 559 | 502 |
| 561 | 493 | 561 | 530 |
| 562 | 488 | 562 | 454 |
| 564 | 460 | 564 | 458 |
| 565 | 480 | 565 | 434 |
| 567 | 452 | 567 | 469 |
| 568 | 456 | 568 | 448 |
| 570 | 477 | 570 | 433 |
| 571 | 456 | 571 | 456 |
| 573 | 419 | 573 | 432 |
| 574 | 406 | 574 | 365 |
| 576 | 420 | 576 | 380 |

|     |     |     |      |
|-----|-----|-----|------|
| 577 | 405 | 577 | 384  |
| 579 | 366 | 579 | 362  |
| 581 | 378 | 581 | 309  |
| 582 | 347 | 582 | 327  |
| 584 | 348 | 584 | 260  |
| 585 | 364 | 585 | 292  |
| 587 | 356 | 587 | 293  |
| 588 | 342 | 588 | 309  |
| 590 | 386 | 590 | 309  |
| 591 | 413 | 591 | 359  |
| 593 | 384 | 593 | 389  |
| 594 | 434 | 594 | 367  |
| 596 | 422 | 596 | 444  |
| 597 | 402 | 597 | 425  |
| 599 | 360 | 599 | 396  |
| 600 | 363 | 600 | 345  |
| 602 | 334 | 602 | 339  |
| 603 | 310 | 603 | 338  |
| 605 | 269 | 605 | 299  |
| 606 | 254 | 606 | 268  |
| 608 | 222 | 608 | 199  |
| 609 | 197 | 609 | 162  |
| 611 | 196 | 611 | 140  |
| 612 | 166 | 612 | 156  |
| 614 | 173 | 614 | 163  |
| 615 | 234 | 615 | 244  |
| 617 | 293 | 617 | 446  |
| 618 | 520 | 618 | 751  |
| 620 | 713 | 620 | 1054 |
| 621 | 661 | 621 | 1007 |
| 623 | 436 | 623 | 671  |
| 624 | 235 | 624 | 371  |
| 626 | 104 | 626 | 215  |
| 627 | 55  | 627 | 85   |
| 629 | 13  | 629 | 38   |
| 630 | -4  | 630 | 10   |
| 632 | 1   | 632 | -10  |
| 633 | 33  | 633 | 44   |
| 635 | 45  | 635 | 123  |
| 636 | 53  | 636 | 201  |
| 638 | 162 | 638 | 336  |
| 639 | 345 | 639 | 673  |
| 641 | 576 | 641 | 1030 |
| 642 | 635 | 642 | 1140 |
| 644 | 444 | 644 | 922  |
| 645 | 265 | 646 | 624  |
| 647 | 163 | 647 | 423  |
| 648 | 48  | 649 | 340  |
| 650 | 26  | 650 | 230  |
| 652 | 23  | 652 | 232  |

|     |     |     |      |
|-----|-----|-----|------|
| 653 | 34  | 653 | 239  |
| 655 | 21  | 655 | 249  |
| 656 | 48  | 656 | 272  |
| 658 | 88  | 658 | 293  |
| 659 | 106 | 659 | 336  |
| 661 | 141 | 661 | 400  |
| 662 | 184 | 662 | 471  |
| 664 | 236 | 664 | 532  |
| 665 | 268 | 665 | 604  |
| 667 | 277 | 667 | 663  |
| 668 | 294 | 668 | 638  |
| 670 | 308 | 670 | 646  |
| 671 | 279 | 671 | 654  |
| 673 | 246 | 673 | 586  |
| 674 | 231 | 674 | 552  |
| 676 | 220 | 676 | 549  |
| 677 | 195 | 677 | 540  |
| 679 | 151 | 679 | 507  |
| 680 | 144 | 680 | 480  |
| 682 | 164 | 682 | 496  |
| 683 | 136 | 683 | 506  |
| 685 | 121 | 685 | 464  |
| 686 | 111 | 686 | 437  |
| 687 | 134 | 688 | 424  |
| 689 | 134 | 689 | 459  |
| 690 | 109 | 691 | 493  |
| 692 | 105 | 692 | 471  |
| 693 | 137 | 693 | 513  |
| 695 | 134 | 695 | 560  |
| 696 | 166 | 696 | 576  |
| 698 | 193 | 698 | 624  |
| 699 | 203 | 699 | 644  |
| 701 | 169 | 701 | 661  |
| 702 | 158 | 702 | 623  |
| 704 | 152 | 704 | 630  |
| 705 | 196 | 705 | 667  |
| 707 | 237 | 707 | 770  |
| 708 | 285 | 708 | 880  |
| 710 | 358 | 710 | 989  |
| 711 | 421 | 711 | 1143 |
| 713 | 520 | 713 | 1267 |
| 714 | 600 | 714 | 1412 |
| 716 | 631 | 716 | 1506 |
| 717 | 701 | 717 | 1530 |
| 719 | 679 | 719 | 1589 |
| 720 | 660 | 720 | 1545 |
| 722 | 662 | 722 | 1506 |
| 723 | 633 | 723 | 1492 |
| 725 | 569 | 725 | 1404 |
| 726 | 558 | 726 | 1301 |

|     |     |     |      |
|-----|-----|-----|------|
| 728 | 494 | 728 | 1234 |
| 729 | 418 | 729 | 1133 |
| 731 | 331 | 731 | 1039 |
| 732 | 268 | 732 | 941  |
| 734 | 279 | 734 | 894  |
| 735 | 240 | 735 | 909  |
| 737 | 267 | 737 | 907  |
| 738 | 292 | 738 | 953  |
| 740 | 307 | 740 | 1010 |
| 741 | 362 | 741 | 1035 |
| 743 | 377 | 743 | 1105 |
| 744 | 395 | 744 | 1119 |
| 746 | 399 | 746 | 1151 |
| 747 | 415 | 747 | 1148 |
| 749 | 434 | 749 | 1134 |
| 750 | 445 | 750 | 1158 |
| 752 | 472 | 752 | 1200 |
| 753 | 549 | 753 | 1297 |
| 755 | 625 | 755 | 1459 |
| 756 | 708 | 756 | 1536 |
| 757 | 720 | 757 | 1563 |
| 759 | 675 | 759 | 1477 |
| 760 | 619 | 760 | 1340 |
| 762 | 564 | 762 | 1191 |
| 763 | 511 | 763 | 1086 |
| 765 | 452 | 765 | 957  |
| 766 | 401 | 766 | 854  |
| 768 | 364 | 768 | 737  |
| 769 | 373 | 769 | 665  |
| 771 | 383 | 771 | 672  |
| 772 | 452 | 772 | 665  |
| 774 | 523 | 774 | 795  |
| 775 | 604 | 775 | 896  |
| 777 | 750 | 777 | 1014 |
| 778 | 866 | 778 | 1241 |
| 780 | 901 | 780 | 1333 |
| 781 | 883 | 781 | 1333 |
| 783 | 806 | 783 | 1250 |
| 784 | 700 | 784 | 1108 |
| 786 | 594 | 786 | 934  |
| 787 | 466 | 787 | 787  |
| 789 | 351 | 789 | 598  |
| 790 | 272 | 790 | 426  |
| 791 | 119 | 791 | 292  |
| 793 | 65  | 793 | 127  |
| 794 | 13  | 794 | 42   |
| 796 | -3  | 796 | -4   |
| 797 | 2   | 797 | 7    |
| 799 | -2  | 799 | 15   |
| 800 | 7   | 800 | 30   |

|     |      |     |      |
|-----|------|-----|------|
| 802 | 30   | 802 | 87   |
| 803 | 85   | 803 | 154  |
| 805 | 66   | 805 | 237  |
| 806 | 125  | 806 | 243  |
| 808 | 159  | 808 | 329  |
| 809 | 165  | 809 | 374  |
| 811 | 151  | 811 | 390  |
| 812 | 145  | 812 | 394  |
| 814 | 137  | 814 | 401  |
| 815 | 206  | 815 | 416  |
| 817 | 237  | 817 | 527  |
| 818 | 308  | 818 | 607  |
| 819 | 408  | 819 | 748  |
| 821 | 479  | 821 | 949  |
| 822 | 596  | 822 | 1095 |
| 824 | 730  | 824 | 1263 |
| 825 | 771  | 825 | 1447 |
| 827 | 819  | 827 | 1489 |
| 828 | 809  | 828 | 1507 |
| 830 | 778  | 830 | 1454 |
| 831 | 750  | 831 | 1394 |
| 833 | 668  | 833 | 1280 |
| 834 | 568  | 834 | 1157 |
| 836 | 543  | 836 | 1031 |
| 837 | 494  | 837 | 981  |
| 839 | 479  | 839 | 922  |
| 840 | 474  | 840 | 921  |
| 841 | 513  | 841 | 964  |
| 843 | 580  | 843 | 1048 |
| 844 | 669  | 844 | 1210 |
| 846 | 799  | 846 | 1407 |
| 847 | 918  | 847 | 1655 |
| 849 | 1097 | 849 | 1845 |
| 850 | 1168 | 850 | 2069 |
| 852 | 1207 | 852 | 2077 |
| 853 | 1154 | 853 | 2032 |
| 855 | 1086 | 855 | 1891 |
| 856 | 952  | 856 | 1715 |
| 858 | 847  | 858 | 1499 |
| 859 | 720  | 859 | 1353 |
| 861 | 621  | 861 | 1189 |
| 862 | 583  | 862 | 1053 |
| 863 | 452  | 863 | 980  |
| 865 | 439  | 865 | 808  |
| 866 | 363  | 866 | 780  |
| 868 | 338  | 868 | 704  |
| 869 | 381  | 869 | 719  |
| 871 | 414  | 871 | 755  |
| 872 | 424  | 872 | 840  |
| 874 | 423  | 874 | 866  |

|     |     |     |      |
|-----|-----|-----|------|
| 875 | 447 | 875 | 883  |
| 877 | 415 | 877 | 855  |
| 878 | 384 | 878 | 777  |
| 879 | 323 | 879 | 700  |
| 881 | 291 | 881 | 571  |
| 882 | 211 | 882 | 538  |
| 884 | 210 | 884 | 440  |
| 885 | 164 | 885 | 430  |
| 887 | 144 | 887 | 408  |
| 888 | 165 | 888 | 406  |
| 890 | 132 | 890 | 396  |
| 891 | 142 | 891 | 382  |
| 893 | 145 | 893 | 359  |
| 894 | 163 | 894 | 339  |
| 895 | 148 | 895 | 334  |
| 897 | 147 | 897 | 299  |
| 898 | 95  | 898 | 299  |
| 900 | 87  | 900 | 249  |
| 901 | 85  | 901 | 207  |
| 903 | 73  | 903 | 177  |
| 904 | 54  | 904 | 119  |
| 906 | 24  | 906 | 62   |
| 907 | -8  | 907 | 22   |
| 909 | 2   | 909 | -19  |
| 910 | 2   | 910 | -4   |
| 911 | 14  | 911 | 4    |
| 913 | 39  | 913 | 32   |
| 914 | 53  | 914 | 94   |
| 916 | 157 | 916 | 121  |
| 917 | 244 | 917 | 269  |
| 919 | 283 | 919 | 401  |
| 920 | 313 | 920 | 493  |
| 922 | 361 | 922 | 548  |
| 923 | 413 | 923 | 598  |
| 925 | 444 | 925 | 656  |
| 926 | 484 | 926 | 736  |
| 927 | 507 | 927 | 805  |
| 929 | 556 | 929 | 869  |
| 930 | 593 | 930 | 951  |
| 932 | 632 | 932 | 1011 |
| 933 | 648 | 933 | 1089 |
| 935 | 645 | 935 | 1081 |
| 936 | 619 | 936 | 1055 |
| 938 | 597 | 938 | 992  |
| 939 | 552 | 939 | 918  |
| 940 | 483 | 940 | 829  |
| 942 | 438 | 942 | 740  |
| 943 | 423 | 943 | 683  |
| 945 | 379 | 945 | 612  |
| 946 | 407 | 946 | 575  |



|      |      |      |      |
|------|------|------|------|
| 948  | 339  | 948  | 616  |
| 949  | 342  | 949  | 533  |
| 951  | 341  | 951  | 562  |
| 952  | 372  | 952  | 581  |
| 953  | 385  | 953  | 630  |
| 955  | 454  | 955  | 670  |
| 956  | 458  | 956  | 729  |
| 958  | 444  | 958  | 748  |
| 959  | 441  | 959  | 714  |
| 961  | 381  | 961  | 692  |
| 962  | 357  | 962  | 595  |
| 964  | 360  | 964  | 560  |
| 965  | 305  | 965  | 582  |
| 966  | 279  | 966  | 515  |
| 968  | 265  | 968  | 499  |
| 969  | 217  | 969  | 499  |
| 971  | 198  | 971  | 429  |
| 972  | 196  | 972  | 396  |
| 974  | 150  | 974  | 365  |
| 975  | 110  | 975  | 287  |
| 976  | 57   | 976  | 200  |
| 978  | 24   | 978  | 96   |
| 979  | 22   | 979  | 34   |
| 981  | 0    | 981  | 0    |
| 982  | -1   | 982  | 0    |
| 984  | 16   | 984  | -4   |
| 985  | 16   | 985  | 61   |
| 987  | 68   | 987  | 90   |
| 988  | 157  | 988  | 172  |
| 989  | 163  | 989  | 286  |
| 991  | 167  | 991  | 239  |
| 992  | 174  | 992  | 259  |
| 994  | 231  | 994  | 290  |
| 995  | 311  | 995  | 499  |
| 997  | 566  | 997  | 885  |
| 998  | 1087 | 998  | 1824 |
| 999  | 2130 | 999  | 3621 |
| 1001 | 3610 | 1001 | 5893 |
| 1002 | 4308 | 1002 | 6948 |
| 1004 | 3525 | 1004 | 5798 |
| 1005 | 2251 | 1005 | 3779 |
| 1007 | 1332 | 1007 | 2351 |
| 1008 | 955  | 1008 | 1567 |
| 1010 | 841  | 1009 | 1249 |
| 1011 | 700  | 1011 | 1067 |
| 1012 | 575  | 1012 | 828  |
| 1014 | 450  | 1014 | 620  |
| 1015 | 315  | 1015 | 468  |
| 1017 | 260  | 1017 | 326  |
| 1018 | 197  | 1018 | 261  |

|      |      |
|------|------|
| 1020 | 187  |
| 1021 | 217  |
| 1022 | 229  |
| 1024 | 328  |
| 1025 | 445  |
| 1027 | 597  |
| 1028 | 793  |
| 1030 | 1011 |
| 1031 | 1114 |
| 1032 | 1018 |
| 1034 | 887  |
| 1035 | 735  |
| 1037 | 631  |
| 1038 | 574  |
| 1040 | 528  |
| 1041 | 504  |
| 1042 | 530  |
| 1044 | 494  |
| 1045 | 477  |
| 1047 | 483  |
| 1048 | 469  |
| 1049 | 495  |
| 1051 | 501  |
| 1052 | 515  |
| 1054 | 593  |
| 1055 | 634  |
| 1057 | 629  |
| 1058 | 706  |
| 1059 | 790  |
| 1061 | 783  |
| 1062 | 846  |
| 1064 | 880  |
| 1065 | 860  |
| 1067 | 872  |
| 1068 | 874  |
| 1069 | 899  |
| 1071 | 912  |
| 1072 | 979  |
| 1074 | 1039 |
| 1075 | 1091 |
| 1076 | 1154 |
| 1078 | 1197 |
| 1079 | 1262 |
| 1081 | 1296 |
| 1082 | 1305 |
| 1084 | 1332 |
| 1085 | 1367 |
| 1086 | 1385 |
| 1088 | 1420 |
| 1089 | 1415 |

|      |      |
|------|------|
| 1020 | 211  |
| 1021 | 267  |
| 1022 | 330  |
| 1024 | 417  |
| 1025 | 651  |
| 1027 | 972  |
| 1028 | 1323 |
| 1030 | 1624 |
| 1031 | 1777 |
| 1032 | 1699 |
| 1034 | 1467 |
| 1035 | 1252 |
| 1037 | 1052 |
| 1038 | 938  |
| 1040 | 892  |
| 1041 | 857  |
| 1042 | 830  |
| 1044 | 870  |
| 1045 | 842  |
| 1047 | 835  |
| 1048 | 887  |
| 1049 | 874  |
| 1051 | 991  |
| 1052 | 1000 |
| 1054 | 1043 |
| 1055 | 1214 |
| 1057 | 1326 |
| 1058 | 1409 |
| 1059 | 1559 |
| 1061 | 1741 |
| 1062 | 1773 |
| 1064 | 1856 |
| 1065 | 1872 |
| 1067 | 1817 |
| 1068 | 1872 |
| 1069 | 1879 |
| 1071 | 1958 |
| 1072 | 2043 |
| 1074 | 2178 |
| 1075 | 2326 |
| 1076 | 2422 |
| 1078 | 2529 |
| 1079 | 2592 |
| 1081 | 2674 |
| 1082 | 2725 |
| 1084 | 2724 |
| 1085 | 2740 |
| 1086 | 2761 |
| 1088 | 2741 |
| 1089 | 2750 |

|      |      |      |      |
|------|------|------|------|
| 1091 | 1413 | 1091 | 2752 |
| 1092 | 1467 | 1092 | 2724 |
| 1093 | 1426 | 1093 | 2778 |
| 1095 | 1463 | 1095 | 2702 |
| 1096 | 1478 | 1096 | 2735 |
| 1098 | 1486 | 1098 | 2717 |
| 1099 | 1489 | 1099 | 2675 |
| 1101 | 1474 | 1101 | 2637 |
| 1102 | 1414 | 1102 | 2542 |
| 1103 | 1319 | 1103 | 2413 |
| 1105 | 1250 | 1105 | 2246 |
| 1106 | 1133 | 1106 | 2110 |
| 1108 | 1077 | 1108 | 1894 |
| 1109 | 996  | 1109 | 1790 |
| 1110 | 905  | 1110 | 1640 |
| 1112 | 861  | 1112 | 1518 |
| 1113 | 808  | 1113 | 1461 |
| 1115 | 829  | 1115 | 1402 |
| 1116 | 828  | 1116 | 1436 |
| 1118 | 853  | 1118 | 1503 |
| 1119 | 910  | 1119 | 1585 |
| 1120 | 1015 | 1120 | 1760 |
| 1122 | 1057 | 1122 | 1964 |
| 1123 | 1193 | 1123 | 2075 |
| 1125 | 1255 | 1125 | 2233 |
| 1126 | 1234 | 1126 | 2261 |
| 1127 | 1153 | 1127 | 2125 |
| 1129 | 1007 | 1129 | 1866 |
| 1130 | 850  | 1130 | 1547 |
| 1132 | 648  | 1132 | 1220 |
| 1133 | 490  | 1133 | 904  |
| 1134 | 301  | 1134 | 597  |
| 1136 | 189  | 1136 | 350  |
| 1137 | 92   | 1137 | 171  |
| 1139 | 37   | 1139 | 34   |
| 1140 | -1   | 1140 | -9   |
| 1141 | 13   | 1141 | -23  |
| 1143 | 17   | 1143 | -8   |
| 1144 | 67   | 1144 | 32   |
| 1146 | 137  | 1146 | 126  |
| 1147 | 156  | 1147 | 257  |
| 1148 | 174  | 1148 | 322  |
| 1150 | 261  | 1150 | 434  |
| 1151 | 350  | 1151 | 580  |
| 1153 | 427  | 1153 | 765  |
| 1154 | 506  | 1154 | 912  |
| 1155 | 548  | 1155 | 993  |
| 1157 | 560  | 1157 | 1004 |
| 1158 | 529  | 1158 | 986  |
| 1160 | 509  | 1160 | 930  |

|      |      |      |      |
|------|------|------|------|
| 1161 | 460  | 1161 | 889  |
| 1163 | 471  | 1162 | 836  |
| 1164 | 502  | 1164 | 896  |
| 1165 | 566  | 1165 | 987  |
| 1167 | 644  | 1167 | 1116 |
| 1168 | 726  | 1168 | 1296 |
| 1170 | 844  | 1170 | 1472 |
| 1171 | 952  | 1171 | 1645 |
| 1172 | 1014 | 1172 | 1764 |
| 1174 | 1033 | 1174 | 1811 |
| 1175 | 1025 | 1175 | 1807 |
| 1177 | 988  | 1177 | 1758 |
| 1178 | 923  | 1178 | 1704 |
| 1179 | 926  | 1179 | 1616 |
| 1181 | 937  | 1181 | 1614 |
| 1182 | 911  | 1182 | 1607 |
| 1184 | 924  | 1183 | 1612 |
| 1185 | 948  | 1185 | 1626 |
| 1186 | 981  | 1186 | 1661 |
| 1188 | 1005 | 1188 | 1741 |
| 1189 | 1097 | 1189 | 1804 |
| 1190 | 1150 | 1190 | 1943 |
| 1192 | 1230 | 1192 | 2081 |
| 1193 | 1329 | 1193 | 2191 |
| 1195 | 1411 | 1195 | 2356 |
| 1196 | 1489 | 1196 | 2535 |
| 1197 | 1627 | 1197 | 2698 |
| 1199 | 1731 | 1199 | 2993 |
| 1200 | 1934 | 1200 | 3214 |
| 1202 | 2120 | 1202 | 3553 |
| 1203 | 2285 | 1203 | 3882 |
| 1204 | 2423 | 1204 | 4122 |
| 1206 | 2509 | 1206 | 4300 |
| 1207 | 2570 | 1207 | 4360 |
| 1209 | 2530 | 1209 | 4362 |
| 1210 | 2483 | 1210 | 4262 |
| 1211 | 2410 | 1211 | 4125 |
| 1213 | 2389 | 1213 | 4019 |
| 1214 | 2394 | 1214 | 4004 |
| 1216 | 2418 | 1216 | 4045 |
| 1217 | 2477 | 1217 | 4135 |
| 1218 | 2502 | 1218 | 4260 |
| 1220 | 2636 | 1220 | 4377 |
| 1221 | 2734 | 1221 | 4594 |
| 1223 | 2847 | 1223 | 4789 |
| 1224 | 2905 | 1224 | 4986 |
| 1225 | 3018 | 1225 | 5172 |
| 1227 | 3070 | 1227 | 5382 |
| 1228 | 3141 | 1228 | 5501 |
| 1229 | 3245 | 1229 | 5668 |

|      |      |      |      |
|------|------|------|------|
| 1231 | 3245 | 1231 | 5840 |
| 1232 | 3317 | 1232 | 5918 |
| 1234 | 3361 | 1234 | 6054 |
| 1235 | 3462 | 1235 | 6154 |
| 1236 | 3453 | 1236 | 6316 |
| 1238 | 3512 | 1238 | 6375 |
| 1239 | 3560 | 1239 | 6504 |
| 1241 | 3585 | 1241 | 6609 |
| 1242 | 3613 | 1242 | 6687 |
| 1243 | 3652 | 1243 | 6791 |
| 1245 | 3679 | 1245 | 6908 |
| 1246 | 3689 | 1246 | 6980 |
| 1248 | 3714 | 1247 | 7088 |
| 1249 | 3707 | 1249 | 7140 |
| 1250 | 3702 | 1250 | 7182 |
| 1252 | 3734 | 1252 | 7234 |
| 1253 | 3733 | 1253 | 7352 |
| 1254 | 3731 | 1254 | 7386 |
| 1256 | 3782 | 1256 | 7453 |
| 1257 | 3795 | 1257 | 7551 |
| 1259 | 3791 | 1259 | 7616 |
| 1260 | 3838 | 1260 | 7642 |
| 1261 | 3798 | 1261 | 7714 |
| 1263 | 3818 | 1263 | 7681 |
| 1264 | 3859 | 1264 | 7716 |
| 1266 | 3819 | 1265 | 7742 |
| 1267 | 3793 | 1267 | 7668 |
| 1268 | 3793 | 1268 | 7601 |
| 1270 | 3781 | 1270 | 7551 |
| 1271 | 3735 | 1271 | 7474 |
| 1272 | 3672 | 1272 | 7374 |
| 1274 | 3691 | 1274 | 7263 |
| 1275 | 3659 | 1275 | 7222 |
| 1277 | 3594 | 1277 | 7152 |
| 1278 | 3629 | 1278 | 7044 |
| 1279 | 3615 | 1279 | 7098 |
| 1281 | 3626 | 1281 | 7069 |
| 1282 | 3621 | 1282 | 7111 |
| 1283 | 3660 | 1283 | 7133 |
| 1285 | 3705 | 1285 | 7211 |
| 1286 | 3716 | 1286 | 7295 |
| 1288 | 3783 | 1288 | 7365 |
| 1289 | 3840 | 1289 | 7534 |
| 1290 | 3923 | 1290 | 7654 |
| 1292 | 4013 | 1292 | 7888 |
| 1293 | 4077 | 1293 | 8138 |
| 1294 | 4195 | 1294 | 8387 |
| 1296 | 4289 | 1296 | 8678 |
| 1297 | 4417 | 1297 | 8896 |
| 1299 | 4523 | 1299 | 9143 |

|      |      |      |      |
|------|------|------|------|
| 1300 | 4612 | 1300 | 9335 |
| 1301 | 4646 | 1301 | 9463 |
| 1303 | 4677 | 1303 | 9474 |
| 1304 | 4698 | 1304 | 9485 |
| 1305 | 4736 | 1305 | 9433 |
| 1307 | 4773 | 1307 | 9400 |
| 1308 | 4780 | 1308 | 9372 |
| 1310 | 4787 | 1310 | 9334 |
| 1311 | 4788 | 1311 | 9286 |
| 1312 | 4799 | 1312 | 9220 |
| 1314 | 4787 | 1314 | 9183 |
| 1315 | 4774 | 1315 | 9116 |
| 1316 | 4746 | 1316 | 9042 |
| 1318 | 4707 | 1318 | 8943 |
| 1319 | 4666 | 1319 | 8836 |
| 1321 | 4591 | 1321 | 8711 |
| 1322 | 4572 | 1322 | 8560 |
| 1323 | 4485 | 1323 | 8468 |
| 1325 | 4430 | 1325 | 8301 |
| 1326 | 4383 | 1326 | 8204 |
| 1327 | 4394 | 1327 | 8100 |
| 1329 | 4368 | 1329 | 8077 |
| 1330 | 4372 | 1330 | 8059 |
| 1332 | 4369 | 1331 | 8079 |
| 1333 | 4391 | 1333 | 8093 |
| 1334 | 4357 | 1334 | 8097 |
| 1336 | 4382 | 1336 | 8095 |
| 1337 | 4372 | 1337 | 8128 |
| 1338 | 4317 | 1338 | 8068 |
| 1340 | 4244 | 1340 | 7981 |
| 1341 | 4173 | 1341 | 7803 |
| 1342 | 4048 | 1342 | 7616 |
| 1344 | 3904 | 1344 | 7334 |
| 1345 | 3718 | 1345 | 7047 |
| 1347 | 3527 | 1347 | 6701 |
| 1348 | 3376 | 1348 | 6362 |
| 1349 | 3229 | 1349 | 6094 |
| 1351 | 3099 | 1351 | 5783 |
| 1352 | 2988 | 1352 | 5556 |
| 1353 | 2876 | 1353 | 5363 |
| 1355 | 2779 | 1355 | 5212 |
| 1356 | 2732 | 1356 | 5044 |
| 1357 | 2699 | 1357 | 4959 |
| 1359 | 2627 | 1359 | 4857 |
| 1360 | 2576 | 1360 | 4752 |
| 1362 | 2531 | 1362 | 4673 |
| 1363 | 2472 | 1363 | 4592 |
| 1364 | 2433 | 1364 | 4473 |
| 1366 | 2400 | 1366 | 4403 |
| 1367 | 2390 | 1367 | 4303 |

|      |      |      |      |
|------|------|------|------|
| 1368 | 2314 | 1368 | 4251 |
| 1370 | 2273 | 1370 | 4094 |
| 1371 | 2218 | 1371 | 3990 |
| 1372 | 2145 | 1372 | 3876 |
| 1374 | 2106 | 1374 | 3761 |
| 1375 | 2080 | 1375 | 3673 |
| 1377 | 2035 | 1377 | 3608 |
| 1378 | 2009 | 1378 | 3556 |
| 1379 | 2007 | 1379 | 3489 |
| 1381 | 1978 | 1381 | 3500 |
| 1382 | 1980 | 1382 | 3474 |
| 1383 | 1950 | 1383 | 3483 |
| 1385 | 2012 | 1385 | 3467 |
| 1386 | 1972 | 1386 | 3519 |
| 1387 | 1964 | 1387 | 3503 |
| 1389 | 1976 | 1389 | 3475 |
| 1390 | 1952 | 1390 | 3509 |
| 1391 | 1944 | 1391 | 3486 |
| 1393 | 1951 | 1393 | 3476 |
| 1394 | 1924 | 1394 | 3499 |
| 1396 | 1899 | 1396 | 3505 |
| 1397 | 1897 | 1397 | 3487 |
| 1398 | 1906 | 1398 | 3500 |
| 1400 | 1906 | 1400 | 3512 |
| 1401 | 1894 | 1401 | 3515 |
| 1402 | 1897 | 1402 | 3525 |
| 1404 | 1904 | 1404 | 3532 |
| 1405 | 1902 | 1405 | 3522 |
| 1406 | 1886 | 1406 | 3524 |
| 1408 | 1908 | 1408 | 3545 |
| 1409 | 1948 | 1409 | 3619 |
| 1410 | 2007 | 1410 | 3727 |
| 1412 | 2052 | 1412 | 3846 |
| 1413 | 2110 | 1413 | 3975 |
| 1415 | 2189 | 1415 | 4129 |
| 1416 | 2257 | 1416 | 4304 |
| 1417 | 2339 | 1417 | 4468 |
| 1419 | 2369 | 1419 | 4598 |
| 1420 | 2397 | 1420 | 4686 |
| 1421 | 2482 | 1421 | 4792 |
| 1423 | 2503 | 1423 | 4895 |
| 1424 | 2537 | 1424 | 5016 |
| 1425 | 2584 | 1425 | 5168 |
| 1427 | 2699 | 1427 | 5405 |
| 1428 | 2836 | 1428 | 5793 |
| 1429 | 3035 | 1429 | 6268 |
| 1431 | 3276 | 1431 | 6905 |
| 1432 | 3589 | 1432 | 7601 |
| 1433 | 3955 | 1433 | 8390 |
| 1435 | 4308 | 1435 | 9220 |

|      |      |      |       |
|------|------|------|-------|
| 1436 | 4663 | 1436 | 9929  |
| 1437 | 4969 | 1437 | 10545 |
| 1439 | 5207 | 1439 | 11030 |
| 1440 | 5406 | 1440 | 11377 |
| 1442 | 5553 | 1442 | 11651 |
| 1443 | 5731 | 1443 | 11834 |
| 1444 | 5839 | 1444 | 12052 |
| 1446 | 5990 | 1446 | 12174 |
| 1447 | 6005 | 1447 | 12295 |
| 1448 | 6011 | 1448 | 12182 |
| 1450 | 5944 | 1450 | 11967 |
| 1451 | 5791 | 1451 | 11689 |
| 1452 | 5646 | 1452 | 11348 |
| 1454 | 5510 | 1454 | 11029 |
| 1455 | 5360 | 1455 | 10766 |
| 1456 | 5186 | 1456 | 10450 |
| 1458 | 5073 | 1458 | 10095 |
| 1459 | 4939 | 1459 | 9823  |
| 1460 | 4783 | 1460 | 9497  |
| 1462 | 4633 | 1462 | 9098  |
| 1463 | 4437 | 1463 | 8703  |
| 1464 | 4198 | 1464 | 8183  |
| 1466 | 3913 | 1466 | 7649  |
| 1467 | 3645 | 1467 | 7090  |
| 1468 | 3372 | 1468 | 6562  |
| 1470 | 3111 | 1470 | 6031  |
| 1471 | 2881 | 1471 | 5540  |
| 1472 | 2660 | 1472 | 5094  |
| 1474 | 2455 | 1474 | 4689  |
| 1475 | 2295 | 1475 | 4324  |
| 1476 | 2154 | 1476 | 4012  |
| 1478 | 1996 | 1478 | 3735  |
| 1479 | 1878 | 1479 | 3512  |
| 1481 | 1787 | 1480 | 3283  |
| 1482 | 1710 | 1482 | 3099  |
| 1483 | 1615 | 1483 | 2925  |
| 1485 | 1519 | 1485 | 2710  |
| 1486 | 1420 | 1486 | 2524  |
| 1487 | 1293 | 1487 | 2318  |
| 1489 | 1196 | 1489 | 2093  |
| 1490 | 1091 | 1490 | 1877  |
| 1491 | 986  | 1491 | 1670  |
| 1493 | 878  | 1493 | 1465  |
| 1494 | 759  | 1494 | 1278  |
| 1495 | 662  | 1495 | 1093  |
| 1497 | 591  | 1497 | 930   |
| 1498 | 531  | 1498 | 812   |
| 1499 | 465  | 1499 | 727   |
| 1501 | 440  | 1501 | 622   |
| 1502 | 387  | 1502 | 570   |



|      |     |
|------|-----|
| 1503 | 357 |
| 1505 | 335 |
| 1506 | 291 |
| 1507 | 271 |
| 1509 | 252 |
| 1510 | 226 |
| 1511 | 181 |
| 1513 | 168 |
| 1514 | 132 |
| 1515 | 112 |
| 1517 | 107 |
| 1518 | 79  |
| 1519 | 60  |
| 1521 | 60  |
| 1522 | 41  |
| 1523 | 41  |
| 1525 | 36  |
| 1526 | 14  |
| 1527 | 19  |
| 1529 | 24  |
| 1530 | 10  |
| 1531 | 23  |
| 1533 | 18  |
| 1534 | 5   |
| 1535 | -2  |
| 1537 | 17  |
| 1538 | 37  |
| 1539 | 43  |
| 1541 | 55  |
| 1542 | 81  |
| 1543 | 122 |
| 1545 | 184 |
| 1546 | 207 |
| 1547 | 239 |
| 1549 | 265 |
| 1550 | 294 |
| 1551 | 337 |
| 1553 | 370 |
| 1554 | 393 |
| 1555 | 392 |
| 1556 | 384 |
| 1558 | 383 |
| 1559 | 350 |
| 1560 | 361 |
| 1562 | 352 |
| 1563 | 391 |
| 1564 | 435 |
| 1566 | 488 |
| 1567 | 524 |
| 1568 | 594 |

|      |     |
|------|-----|
| 1503 | 513 |
| 1505 | 463 |
| 1506 | 440 |
| 1507 | 386 |
| 1509 | 351 |
| 1510 | 319 |
| 1511 | 294 |
| 1513 | 246 |
| 1514 | 210 |
| 1515 | 172 |
| 1517 | 150 |
| 1518 | 142 |
| 1519 | 90  |
| 1521 | 73  |
| 1522 | 66  |
| 1523 | 29  |
| 1525 | 40  |
| 1526 | 30  |
| 1527 | 0   |
| 1529 | 11  |
| 1530 | 10  |
| 1531 | -2  |
| 1533 | 5   |
| 1534 | -3  |
| 1535 | 1   |
| 1537 | -2  |
| 1538 | 22  |
| 1539 | 83  |
| 1541 | 104 |
| 1542 | 151 |
| 1543 | 214 |
| 1545 | 300 |
| 1546 | 384 |
| 1547 | 430 |
| 1548 | 483 |
| 1550 | 509 |
| 1551 | 556 |
| 1552 | 588 |
| 1554 | 608 |
| 1555 | 604 |
| 1556 | 596 |
| 1558 | 562 |
| 1559 | 549 |
| 1560 | 535 |
| 1562 | 567 |
| 1563 | 572 |
| 1564 | 650 |
| 1566 | 715 |
| 1567 | 797 |
| 1568 | 844 |

|      |      |      |      |
|------|------|------|------|
| 1570 | 630  | 1570 | 953  |
| 1571 | 702  | 1571 | 1000 |
| 1572 | 760  | 1572 | 1112 |
| 1574 | 805  | 1574 | 1199 |
| 1575 | 825  | 1575 | 1253 |
| 1576 | 845  | 1576 | 1235 |
| 1578 | 843  | 1578 | 1270 |
| 1579 | 826  | 1579 | 1257 |
| 1580 | 839  | 1580 | 1258 |
| 1582 | 857  | 1582 | 1285 |
| 1583 | 890  | 1583 | 1326 |
| 1584 | 885  | 1584 | 1337 |
| 1586 | 837  | 1586 | 1262 |
| 1587 | 765  | 1587 | 1107 |
| 1588 | 684  | 1588 | 986  |
| 1590 | 657  | 1590 | 875  |
| 1591 | 624  | 1591 | 851  |
| 1592 | 670  | 1592 | 835  |
| 1594 | 698  | 1593 | 906  |
| 1595 | 746  | 1595 | 963  |
| 1596 | 798  | 1596 | 1042 |
| 1597 | 834  | 1597 | 1130 |
| 1599 | 906  | 1599 | 1253 |
| 1600 | 1015 | 1600 | 1451 |
| 1601 | 1148 | 1601 | 1687 |
| 1603 | 1278 | 1603 | 1924 |
| 1604 | 1324 | 1604 | 2091 |
| 1605 | 1359 | 1605 | 2119 |
| 1607 | 1299 | 1607 | 2066 |
| 1608 | 1271 | 1608 | 1996 |
| 1609 | 1242 | 1609 | 1985 |
| 1611 | 1259 | 1611 | 2010 |
| 1612 | 1282 | 1612 | 2094 |
| 1613 | 1319 | 1613 | 2157 |
| 1615 | 1361 | 1615 | 2213 |
| 1616 | 1368 | 1616 | 2247 |
| 1617 | 1341 | 1617 | 2229 |
| 1619 | 1310 | 1618 | 2150 |
| 1620 | 1272 | 1620 | 2095 |
| 1621 | 1237 | 1621 | 2032 |
| 1622 | 1209 | 1622 | 1981 |
| 1624 | 1182 | 1624 | 1939 |
| 1625 | 1185 | 1625 | 1947 |
| 1626 | 1201 | 1626 | 1967 |
| 1628 | 1236 | 1628 | 2007 |
| 1629 | 1291 | 1629 | 2108 |
| 1630 | 1363 | 1630 | 2212 |
| 1632 | 1416 | 1632 | 2350 |
| 1633 | 1476 | 1633 | 2475 |
| 1634 | 1576 | 1634 | 2631 |

|      |      |      |      |
|------|------|------|------|
| 1636 | 1682 | 1636 | 2836 |
| 1637 | 1775 | 1637 | 3040 |
| 1638 | 1906 | 1638 | 3281 |
| 1640 | 2023 | 1639 | 3556 |
| 1641 | 2175 | 1641 | 3854 |
| 1642 | 2315 | 1642 | 4186 |
| 1643 | 2493 | 1643 | 4550 |
| 1645 | 2682 | 1645 | 4985 |
| 1646 | 2915 | 1646 | 5468 |
| 1647 | 3141 | 1647 | 6024 |
| 1649 | 3357 | 1649 | 6592 |
| 1650 | 3597 | 1650 | 7107 |
| 1651 | 3839 | 1651 | 7642 |
| 1653 | 4028 | 1653 | 8124 |
| 1654 | 4182 | 1654 | 8467 |
| 1655 | 4304 | 1655 | 8653 |
| 1657 | 4395 | 1656 | 8767 |
| 1658 | 4416 | 1658 | 8729 |
| 1659 | 4400 | 1659 | 8571 |
| 1660 | 4312 | 1660 | 8334 |
| 1662 | 4245 | 1662 | 8006 |
| 1663 | 4109 | 1663 | 7717 |
| 1664 | 4016 | 1664 | 7360 |
| 1666 | 3916 | 1666 | 7112 |
| 1667 | 3817 | 1667 | 6896 |
| 1668 | 3753 | 1668 | 6629 |
| 1670 | 3671 | 1670 | 6439 |
| 1671 | 3519 | 1671 | 6206 |
| 1672 | 3414 | 1672 | 5921 |
| 1673 | 3301 | 1673 | 5710 |
| 1675 | 3205 | 1675 | 5443 |
| 1676 | 3102 | 1676 | 5237 |
| 1677 | 2980 | 1677 | 5030 |
| 1679 | 2859 | 1679 | 4814 |
| 1680 | 2735 | 1680 | 4601 |
| 1681 | 2656 | 1681 | 4392 |
| 1683 | 2551 | 1683 | 4243 |
| 1684 | 2438 | 1684 | 4041 |
| 1685 | 2350 | 1685 | 3831 |
| 1687 | 2245 | 1686 | 3638 |
| 1688 | 2126 | 1688 | 3469 |
| 1689 | 2018 | 1689 | 3236 |
| 1690 | 1913 | 1690 | 3038 |
| 1692 | 1794 | 1692 | 2834 |
| 1693 | 1652 | 1693 | 2624 |
| 1694 | 1535 | 1694 | 2396 |
| 1696 | 1414 | 1696 | 2187 |
| 1697 | 1297 | 1697 | 1978 |
| 1698 | 1203 | 1698 | 1790 |
| 1700 | 1080 | 1699 | 1625 |

|      |     |      |      |
|------|-----|------|------|
| 1701 | 977 | 1701 | 1445 |
| 1702 | 879 | 1702 | 1278 |
| 1703 | 792 | 1703 | 1137 |
| 1705 | 707 | 1705 | 1002 |
| 1706 | 642 | 1706 | 893  |
| 1707 | 583 | 1707 | 810  |
| 1709 | 529 | 1709 | 715  |
| 1710 | 461 | 1710 | 643  |
| 1711 | 444 | 1711 | 574  |
| 1712 | 405 | 1712 | 553  |
| 1714 | 388 | 1714 | 500  |
| 1715 | 364 | 1715 | 468  |
| 1716 | 334 | 1716 | 447  |
| 1718 | 322 | 1718 | 419  |
| 1719 | 299 | 1719 | 401  |
| 1720 | 299 | 1720 | 394  |
| 1722 | 273 | 1722 | 374  |
| 1723 | 273 | 1723 | 371  |
| 1724 | 258 | 1724 | 383  |
| 1725 | 244 | 1725 | 349  |
| 1727 | 244 | 1727 | 354  |
| 1728 | 235 | 1728 | 339  |
| 1729 | 235 | 1729 | 362  |
| 1731 | 242 | 1731 | 353  |
| 1732 | 238 | 1732 | 380  |
| 1733 | 236 | 1733 | 388  |
| 1734 | 231 | 1734 | 414  |
| 1736 | 221 | 1736 | 416  |
| 1737 | 224 | 1737 | 421  |
| 1738 | 224 | 1738 | 450  |
| 1740 | 216 | 1740 | 476  |
| 1741 | 206 | 1741 | 472  |
| 1742 | 210 | 1742 | 464  |
| 1744 | 179 | 1743 | 464  |
| 1745 | 187 | 1745 | 464  |
| 1746 | 168 | 1746 | 465  |
| 1747 | 162 | 1747 | 445  |
| 1749 | 133 | 1749 | 423  |
| 1750 | 115 | 1750 | 372  |
| 1751 | 90  | 1751 | 333  |
| 1753 | 91  | 1753 | 282  |
| 1754 | 55  | 1754 | 259  |
| 1755 | 65  | 1755 | 199  |
| 1756 | 55  | 1756 | 172  |
| 1758 | 20  | 1758 | 134  |
| 1759 | 27  | 1759 | 86   |
| 1760 | 8   | 1760 | 57   |
| 1762 | 12  | 1762 | 33   |
| 1763 | 6   | 1763 | 14   |
| 1764 | -11 | 1764 | 5    |

|      |    |      |     |
|------|----|------|-----|
| 1765 | 4  | 1765 | -8  |
| 1767 | 1  | 1767 | -17 |
| 1768 | 7  | 1768 | -23 |
| 1769 | 9  | 1769 | -9  |
| 1771 | 13 | 1771 | -23 |
| 1772 | 5  | 1772 | -33 |
| 1773 | 25 | 1773 | -15 |
| 1774 | 16 | 1774 | -2  |
| 1776 | 27 | 1776 | -14 |
| 1777 | 8  | 1777 | -4  |
| 1778 | 20 | 1778 | -20 |
| 1780 | 36 | 1780 | -13 |
| 1781 | 29 | 1781 | 0   |
| 1782 | 9  | 1782 | 6   |
| 1783 | -2 | 1783 | -6  |
| 1785 | 8  | 1785 | -43 |
| 1786 | 28 | 1786 | -4  |
| 1787 | 9  | 1787 | 13  |
| 1789 | 15 | 1788 | -15 |
| 1790 | 22 | 1790 | -5  |
| 1791 | 19 | 1791 | 3   |
| 1792 | 9  | 1792 | 8   |
| 1794 | 18 | 1794 | 0   |
| 1795 | 22 | 1795 | 5   |
| 1796 | 22 | 1796 | 1   |
| 1798 | 14 | 1797 | -1  |
| 1799 | 18 | 1799 | 8   |
| 1800 | 2  | 1800 | 1   |
| 1801 | -1 | 1801 | -1  |
