# Supplementary material for: Novel diagnostic and therapeutic techniques reveal changed metabolic profiles in recurrent focal segmental glomerulosclerosis
Source: Springer Nature journal article supplement (doi:10.1038/s41598-021-83883-w), 2021-02-25
Supplement: MOESM4 [file 41598_2021_83883_MOESM4_ESM.pdf]

| 0-biopsy           |                              | FSGS recurrence    |                              |
|--------------------|------------------------------|--------------------|------------------------------|
| Raman Shift (cm-1) | Raman intensity (arb. units) | Raman Shift (cm-1) | Raman intensity (arb. units) |
| 351                | -1                           | 349                | -1                           |
| 352                | -3                           | 351                | 4                            |
| 354                | 0                            | 353                | 10                           |
| 356                | 2                            | 354                | 27                           |
| 357                | 26                           | 356                | 25                           |
| 359                | 4                            | 357                | 8                            |
| 360                | 0                            | 359                | 2                            |
| 362                | 0                            | 360                | 0                            |
| 363                | 7                            | 362                | 0                            |
| 365                | -3                           | 364                | 2                            |
| 367                | 3                            | 365                | 1                            |
| 368                | -1                           | 367                | 0                            |
| 370                | -2                           | 368                | 5                            |
| 371                | 6                            | 370                | 7                            |
| 373                | -3                           | 371                | -1                           |
| 374                | -6                           | 373                | 1                            |
| 376                | 4                            | 374                | 7                            |
| 377                | 8                            | 376                | 0                            |
| 379                | -3                           | 378                | -1                           |
| 381                | 5                            | 379                | 2                            |
| 382                | -2                           | 381                | 5                            |
| 384                | 5                            | 382                | 21                           |
| 385                | 16                           | 384                | 49                           |
| 387                | 42                           | 385                | 101                          |
| 388                | 93                           | 387                | 133                          |
| 390                | 96                           | 388                | 145                          |
| 391                | 113                          | 390                | 158                          |
| 393                | 114                          | 392                | 184                          |
| 395                | 150                          | 393                | 215                          |
| 396                | 168                          | 395                | 247                          |
| 398                | 208                          | 396                | 301                          |
| 399                | 254                          | 398                | 337                          |
| 401                | 269                          | 399                | 372                          |
| 402                | 311                          | 401                | 419                          |
| 404                | 344                          | 402                | 465                          |
| 405                | 386                          | 404                | 495                          |
| 407                | 391                          | 406                | 500                          |
| 409                | 384                          | 407                | 501                          |
| 410                | 385                          | 409                | 499                          |
| 412                | 381                          | 410                | 484                          |
| 413                | 352                          | 412                | 451                          |
| 415                | 320                          | 413                | 420                          |
| 416                | 295                          | 415                | 396                          |
| 418                | 277                          | 416                | 360                          |
| 419                | 241                          | 418                | 322                          |
| 421                | 213                          | 420                | 288                          |
| 423                | 186                          | 421                | 234                          |

|     |     |     |     |
|-----|-----|-----|-----|
| 424 | 129 | 423 | 192 |
| 426 | 111 | 424 | 169 |
| 427 | 94  | 426 | 135 |
| 429 | 65  | 427 | 101 |
| 430 | 45  | 429 | 69  |
| 432 | 19  | 430 | 42  |
| 433 | 9   | 432 | 21  |
| 435 | 5   | 433 | 1   |
| 436 | -14 | 435 | -3  |
| 438 | 17  | 437 | 0   |
| 440 | 17  | 438 | -14 |
| 441 | 8   | 440 | -7  |
| 443 | 43  | 441 | 8   |
| 444 | 48  | 443 | 13  |
| 446 | 60  | 444 | 40  |
| 447 | 98  | 446 | 60  |
| 449 | 88  | 447 | 68  |
| 450 | 106 | 449 | 75  |
| 452 | 94  | 450 | 83  |
| 453 | 115 | 452 | 92  |
| 455 | 106 | 454 | 116 |
| 457 | 154 | 455 | 129 |
| 458 | 129 | 457 | 122 |
| 460 | 138 | 458 | 146 |
| 461 | 160 | 460 | 151 |
| 463 | 142 | 461 | 148 |
| 464 | 147 | 463 | 151 |
| 466 | 147 | 464 | 157 |
| 467 | 155 | 466 | 156 |
| 469 | 149 | 467 | 157 |
| 470 | 166 | 469 | 164 |
| 472 | 176 | 471 | 184 |
| 473 | 211 | 472 | 195 |
| 475 | 215 | 474 | 204 |
| 477 | 240 | 475 | 223 |
| 478 | 261 | 477 | 240 |
| 480 | 273 | 478 | 262 |
| 481 | 308 | 480 | 307 |
| 483 | 354 | 481 | 342 |
| 484 | 375 | 483 | 383 |
| 486 | 425 | 484 | 434 |
| 487 | 467 | 486 | 471 |
| 489 | 488 | 487 | 511 |
| 490 | 522 | 489 | 548 |
| 492 | 544 | 491 | 568 |
| 493 | 542 | 492 | 591 |
| 495 | 566 | 494 | 606 |
| 497 | 562 | 495 | 601 |
| 498 | 551 | 497 | 601 |
| 500 | 561 | 498 | 610 |

|     |     |     |      |
|-----|-----|-----|------|
| 501 | 569 | 500 | 616  |
| 503 | 569 | 501 | 628  |
| 504 | 579 | 503 | 661  |
| 506 | 620 | 504 | 691  |
| 507 | 633 | 506 | 709  |
| 509 | 646 | 507 | 743  |
| 510 | 696 | 509 | 769  |
| 512 | 706 | 510 | 792  |
| 513 | 750 | 512 | 819  |
| 515 | 767 | 514 | 840  |
| 516 | 801 | 515 | 881  |
| 518 | 845 | 517 | 916  |
| 520 | 859 | 518 | 934  |
| 521 | 867 | 520 | 960  |
| 523 | 896 | 521 | 992  |
| 524 | 911 | 523 | 1001 |
| 526 | 903 | 524 | 1013 |
| 527 | 916 | 526 | 1025 |
| 529 | 917 | 527 | 1011 |
| 530 | 897 | 529 | 1019 |
| 532 | 935 | 530 | 1032 |
| 533 | 934 | 532 | 1018 |
| 535 | 919 | 533 | 1019 |
| 536 | 934 | 535 | 1015 |
| 538 | 899 | 536 | 992  |
| 539 | 873 | 538 | 980  |
| 541 | 858 | 540 | 956  |
| 542 | 818 | 541 | 921  |
| 544 | 785 | 543 | 885  |
| 546 | 750 | 544 | 852  |
| 547 | 730 | 546 | 827  |
| 549 | 715 | 547 | 808  |
| 550 | 703 | 549 | 778  |
| 552 | 668 | 550 | 755  |
| 553 | 669 | 552 | 736  |
| 555 | 642 | 553 | 702  |
| 556 | 615 | 555 | 681  |
| 558 | 612 | 556 | 684  |
| 559 | 622 | 558 | 658  |
| 561 | 571 | 559 | 628  |
| 562 | 575 | 561 | 614  |
| 564 | 548 | 562 | 605  |
| 565 | 560 | 564 | 599  |
| 567 | 541 | 565 | 585  |
| 568 | 533 | 567 | 574  |
| 570 | 525 | 568 | 558  |
| 571 | 498 | 570 | 523  |
| 573 | 467 | 571 | 504  |
| 574 | 453 | 573 | 495  |
| 576 | 457 | 575 | 481  |

|     |     |     |     |
|-----|-----|-----|-----|
| 577 | 431 | 576 | 447 |
| 579 | 401 | 578 | 432 |
| 581 | 406 | 579 | 408 |
| 582 | 366 | 581 | 391 |
| 584 | 364 | 582 | 392 |
| 585 | 356 | 584 | 382 |
| 587 | 341 | 585 | 364 |
| 588 | 321 | 587 | 369 |
| 590 | 343 | 588 | 380 |
| 591 | 336 | 590 | 368 |
| 593 | 314 | 591 | 379 |
| 594 | 344 | 593 | 397 |
| 596 | 330 | 594 | 384 |
| 597 | 315 | 596 | 364 |
| 599 | 293 | 597 | 350 |
| 600 | 286 | 599 | 341 |
| 602 | 276 | 600 | 321 |
| 603 | 250 | 602 | 288 |
| 605 | 220 | 603 | 251 |
| 606 | 190 | 605 | 226 |
| 608 | 183 | 606 | 211 |
| 609 | 170 | 608 | 209 |
| 611 | 188 | 609 | 205 |
| 612 | 188 | 611 | 206 |
| 614 | 228 | 612 | 231 |
| 615 | 302 | 614 | 278 |
| 617 | 409 | 615 | 387 |
| 618 | 576 | 617 | 584 |
| 620 | 711 | 618 | 804 |
| 621 | 713 | 620 | 903 |
| 623 | 601 | 621 | 789 |
| 624 | 437 | 623 | 529 |
| 626 | 244 | 624 | 294 |
| 627 | 128 | 626 | 132 |
| 629 | 36  | 627 | 29  |
| 630 | -2  | 629 | -1  |
| 632 | 14  | 630 | 1   |
| 633 | 31  | 632 | 7   |
| 635 | 62  | 634 | 10  |
| 636 | 105 | 635 | 61  |
| 638 | 241 | 637 | 173 |
| 639 | 406 | 638 | 357 |
| 641 | 597 | 640 | 584 |
| 642 | 675 | 641 | 743 |
| 644 | 632 | 643 | 747 |
| 645 | 523 | 644 | 625 |
| 647 | 412 | 646 | 441 |
| 648 | 262 | 647 | 292 |
| 650 | 198 | 649 | 216 |
| 652 | 165 | 650 | 183 |

|     |     |     |     |
|-----|-----|-----|-----|
| 653 | 158 | 652 | 178 |
| 655 | 161 | 653 | 182 |
| 656 | 169 | 655 | 203 |
| 658 | 198 | 656 | 223 |
| 659 | 210 | 658 | 244 |
| 661 | 237 | 659 | 265 |
| 662 | 251 | 661 | 286 |
| 664 | 273 | 662 | 317 |
| 665 | 305 | 664 | 332 |
| 667 | 296 | 665 | 339 |
| 668 | 310 | 667 | 365 |
| 670 | 338 | 668 | 370 |
| 671 | 318 | 670 | 354 |
| 673 | 309 | 671 | 355 |
| 674 | 321 | 673 | 362 |
| 676 | 319 | 674 | 349 |
| 677 | 302 | 676 | 330 |
| 679 | 291 | 677 | 325 |
| 680 | 295 | 679 | 332 |
| 682 | 312 | 680 | 329 |
| 683 | 295 | 682 | 308 |
| 685 | 282 | 683 | 301 |
| 686 | 283 | 685 | 309 |
| 687 | 304 | 686 | 329 |
| 689 | 324 | 688 | 325 |
| 690 | 307 | 689 | 310 |
| 692 | 305 | 691 | 322 |
| 693 | 322 | 692 | 320 |
| 695 | 306 | 694 | 316 |
| 696 | 308 | 695 | 322 |
| 698 | 305 | 697 | 327 |
| 699 | 302 | 698 | 310 |
| 701 | 269 | 700 | 287 |
| 702 | 251 | 701 | 268 |
| 704 | 230 | 703 | 266 |
| 705 | 237 | 704 | 270 |
| 707 | 227 | 705 | 264 |
| 708 | 220 | 707 | 272 |
| 710 | 235 | 708 | 281 |
| 711 | 234 | 710 | 307 |
| 713 | 270 | 711 | 359 |
| 714 | 312 | 713 | 399 |
| 716 | 340 | 714 | 452 |
| 717 | 411 | 716 | 492 |
| 719 | 445 | 717 | 514 |
| 720 | 497 | 719 | 550 |
| 722 | 561 | 720 | 595 |
| 723 | 616 | 722 | 632 |
| 725 | 631 | 723 | 679 |
| 726 | 665 | 725 | 712 |

|     |      |     |      |
|-----|------|-----|------|
| 728 | 643  | 726 | 702  |
| 729 | 615  | 728 | 665  |
| 731 | 562  | 729 | 624  |
| 732 | 546  | 731 | 618  |
| 734 | 548  | 732 | 607  |
| 735 | 521  | 734 | 612  |
| 737 | 537  | 735 | 634  |
| 738 | 547  | 737 | 658  |
| 740 | 555  | 738 | 710  |
| 741 | 608  | 740 | 771  |
| 743 | 624  | 741 | 836  |
| 744 | 683  | 743 | 898  |
| 746 | 695  | 744 | 946  |
| 747 | 734  | 746 | 992  |
| 749 | 764  | 747 | 1017 |
| 750 | 797  | 749 | 1037 |
| 752 | 842  | 750 | 1075 |
| 753 | 924  | 752 | 1134 |
| 755 | 988  | 753 | 1219 |
| 756 | 1070 | 755 | 1309 |
| 757 | 1093 | 756 | 1356 |
| 759 | 1085 | 758 | 1335 |
| 760 | 1022 | 759 | 1262 |
| 762 | 958  | 761 | 1165 |
| 763 | 875  | 762 | 1068 |
| 765 | 804  | 763 | 967  |
| 766 | 709  | 765 | 866  |
| 768 | 648  | 766 | 795  |
| 769 | 613  | 768 | 725  |
| 771 | 564  | 769 | 675  |
| 772 | 564  | 771 | 651  |
| 774 | 560  | 772 | 622  |
| 775 | 554  | 774 | 633  |
| 777 | 599  | 775 | 667  |
| 778 | 615  | 777 | 669  |
| 780 | 597  | 778 | 652  |
| 781 | 574  | 780 | 628  |
| 783 | 532  | 781 | 582  |
| 784 | 472  | 783 | 523  |
| 786 | 418  | 784 | 448  |
| 787 | 342  | 786 | 367  |
| 789 | 277  | 787 | 304  |
| 790 | 232  | 789 | 227  |
| 791 | 143  | 790 | 145  |
| 793 | 94   | 792 | 94   |
| 794 | 55   | 793 | 58   |
| 796 | 41   | 794 | 38   |
| 797 | 18   | 796 | 11   |
| 799 | -2   | 797 | 0    |
| 800 | -3   | 799 | 3    |

|     |      |     |      |
|-----|------|-----|------|
| 802 | 7    | 800 | 16   |
| 803 | 27   | 802 | 10   |
| 805 | 10   | 803 | 24   |
| 806 | 65   | 805 | 63   |
| 808 | 95   | 806 | 93   |
| 809 | 126  | 808 | 116  |
| 811 | 148  | 809 | 142  |
| 812 | 182  | 811 | 181  |
| 814 | 229  | 812 | 248  |
| 815 | 317  | 814 | 308  |
| 817 | 365  | 815 | 375  |
| 818 | 466  | 817 | 486  |
| 819 | 595  | 818 | 604  |
| 821 | 705  | 820 | 738  |
| 822 | 853  | 821 | 912  |
| 824 | 1018 | 822 | 1067 |
| 825 | 1113 | 824 | 1189 |
| 827 | 1191 | 825 | 1283 |
| 828 | 1219 | 827 | 1347 |
| 830 | 1237 | 828 | 1375 |
| 831 | 1208 | 830 | 1344 |
| 833 | 1136 | 831 | 1260 |
| 834 | 1035 | 833 | 1178 |
| 836 | 989  | 834 | 1122 |
| 837 | 940  | 836 | 1076 |
| 839 | 921  | 837 | 1052 |
| 840 | 918  | 839 | 1051 |
| 841 | 945  | 840 | 1081 |
| 843 | 1004 | 842 | 1136 |
| 844 | 1083 | 843 | 1222 |
| 846 | 1198 | 844 | 1333 |
| 847 | 1300 | 846 | 1496 |
| 849 | 1470 | 847 | 1679 |
| 850 | 1560 | 849 | 1833 |
| 852 | 1634 | 850 | 1940 |
| 853 | 1636 | 852 | 1971 |
| 855 | 1581 | 853 | 1920 |
| 856 | 1479 | 855 | 1816 |
| 858 | 1360 | 856 | 1670 |
| 859 | 1218 | 858 | 1509 |
| 861 | 1086 | 859 | 1372 |
| 862 | 1005 | 861 | 1220 |
| 863 | 849  | 862 | 1082 |
| 865 | 796  | 863 | 975  |
| 866 | 698  | 865 | 873  |
| 868 | 658  | 866 | 813  |
| 869 | 633  | 868 | 787  |
| 871 | 659  | 869 | 771  |
| 872 | 648  | 871 | 747  |
| 874 | 644  | 872 | 752  |

|     |     |     |     |
|-----|-----|-----|-----|
| 875 | 671 | 874 | 756 |
| 877 | 656 | 875 | 746 |
| 878 | 649 | 877 | 723 |
| 879 | 615 | 878 | 690 |
| 881 | 616 | 880 | 633 |
| 882 | 595 | 881 | 584 |
| 884 | 646 | 882 | 549 |
| 885 | 691 | 884 | 522 |
| 887 | 756 | 885 | 526 |
| 888 | 813 | 887 | 535 |
| 890 | 808 | 888 | 538 |
| 891 | 764 | 890 | 505 |
| 893 | 656 | 891 | 467 |
| 894 | 585 | 893 | 419 |
| 896 | 471 | 894 | 366 |
| 897 | 395 | 896 | 309 |
| 898 | 301 | 897 | 249 |
| 900 | 236 | 898 | 201 |
| 901 | 181 | 900 | 155 |
| 903 | 132 | 901 | 109 |
| 904 | 81  | 903 | 63  |
| 906 | 46  | 904 | 21  |
| 907 | 9   | 906 | -1  |
| 909 | 18  | 907 | -10 |
| 910 | 12  | 909 | -19 |
| 911 | 18  | 910 | -4  |
| 913 | 50  | 912 | 17  |
| 914 | 65  | 913 | 90  |
| 916 | 175 | 914 | 216 |
| 917 | 274 | 916 | 315 |
| 919 | 330 | 917 | 383 |
| 920 | 369 | 919 | 438 |
| 922 | 408 | 920 | 498 |
| 923 | 455 | 922 | 529 |
| 925 | 471 | 923 | 546 |
| 926 | 511 | 925 | 562 |
| 927 | 532 | 926 | 577 |
| 929 | 580 | 927 | 610 |
| 930 | 614 | 929 | 658 |
| 932 | 674 | 930 | 717 |
| 933 | 706 | 932 | 756 |
| 935 | 722 | 933 | 778 |
| 936 | 713 | 935 | 794 |
| 938 | 705 | 936 | 782 |
| 939 | 667 | 938 | 734 |
| 940 | 604 | 939 | 679 |
| 942 | 559 | 940 | 629 |
| 943 | 511 | 942 | 581 |
| 945 | 474 | 943 | 563 |
| 946 | 485 | 945 | 514 |



|      |      |      |      |
|------|------|------|------|
| 948  | 411  | 946  | 454  |
| 949  | 407  | 948  | 439  |
| 951  | 408  | 949  | 429  |
| 952  | 428  | 951  | 444  |
| 953  | 458  | 952  | 490  |
| 955  | 521  | 953  | 541  |
| 956  | 528  | 955  | 555  |
| 958  | 509  | 956  | 571  |
| 959  | 507  | 958  | 549  |
| 961  | 429  | 959  | 498  |
| 962  | 385  | 961  | 482  |
| 964  | 367  | 962  | 430  |
| 965  | 284  | 964  | 354  |
| 966  | 233  | 965  | 300  |
| 968  | 197  | 966  | 235  |
| 969  | 124  | 968  | 176  |
| 971  | 95   | 969  | 157  |
| 972  | 88   | 971  | 139  |
| 974  | 63   | 972  | 101  |
| 975  | 35   | 974  | 54   |
| 977  | -1   | 975  | 25   |
| 978  | -5   | 977  | 10   |
| 979  | -1   | 978  | 1    |
| 981  | 9    | 979  | -8   |
| 982  | 18   | 981  | -4   |
| 984  | 51   | 982  | -6   |
| 985  | 61   | 984  | 0    |
| 987  | 105  | 985  | 57   |
| 988  | 190  | 987  | 103  |
| 989  | 199  | 988  | 143  |
| 991  | 247  | 989  | 194  |
| 992  | 299  | 991  | 254  |
| 994  | 415  | 992  | 338  |
| 995  | 602  | 994  | 503  |
| 997  | 985  | 995  | 824  |
| 998  | 1642 | 997  | 1383 |
| 999  | 2566 | 998  | 2357 |
| 1001 | 3595 | 999  | 3792 |
| 1002 | 4243 | 1001 | 5101 |
| 1004 | 4162 | 1002 | 5359 |
| 1005 | 3509 | 1004 | 4359 |
| 1007 | 2583 | 1005 | 2968 |
| 1008 | 1855 | 1007 | 1955 |
| 1010 | 1408 | 1008 | 1361 |
| 1011 | 1093 | 1010 | 1034 |
| 1012 | 910  | 1011 | 856  |
| 1014 | 776  | 1012 | 706  |
| 1015 | 629  | 1014 | 571  |
| 1017 | 542  | 1015 | 455  |
| 1018 | 445  | 1017 | 354  |

|      |      |      |      |
|------|------|------|------|
| 1020 | 409  | 1018 | 310  |
| 1021 | 424  | 1020 | 286  |
| 1022 | 441  | 1021 | 308  |
| 1024 | 547  | 1022 | 391  |
| 1025 | 695  | 1024 | 507  |
| 1027 | 875  | 1025 | 695  |
| 1028 | 1105 | 1027 | 981  |
| 1030 | 1348 | 1028 | 1304 |
| 1031 | 1512 | 1030 | 1527 |
| 1032 | 1531 | 1031 | 1586 |
| 1034 | 1470 | 1032 | 1489 |
| 1035 | 1333 | 1034 | 1315 |
| 1037 | 1212 | 1035 | 1151 |
| 1038 | 1114 | 1037 | 1013 |
| 1040 | 1031 | 1038 | 910  |
| 1041 | 975  | 1040 | 859  |
| 1042 | 967  | 1041 | 824  |
| 1044 | 933  | 1042 | 777  |
| 1045 | 909  | 1044 | 751  |
| 1047 | 916  | 1045 | 724  |
| 1048 | 905  | 1047 | 716  |
| 1050 | 970  | 1048 | 710  |
| 1051 | 1004 | 1049 | 692  |
| 1052 | 1085 | 1051 | 736  |
| 1054 | 1316 | 1052 | 830  |
| 1055 | 1619 | 1054 | 917  |
| 1057 | 2028 | 1055 | 1068 |
| 1058 | 2643 | 1057 | 1331 |
| 1059 | 3321 | 1058 | 1619 |
| 1061 | 3758 | 1059 | 1923 |
| 1062 | 3952 | 1061 | 2162 |
| 1064 | 3749 | 1062 | 2174 |
| 1065 | 3214 | 1064 | 1991 |
| 1067 | 2644 | 1065 | 1734 |
| 1068 | 2132 | 1067 | 1488 |
| 1069 | 1760 | 1068 | 1306 |
| 1071 | 1536 | 1069 | 1221 |
| 1072 | 1457 | 1071 | 1209 |
| 1074 | 1440 | 1072 | 1226 |
| 1075 | 1453 | 1074 | 1269 |
| 1077 | 1490 | 1075 | 1323 |
| 1078 | 1515 | 1076 | 1384 |
| 1079 | 1557 | 1078 | 1443 |
| 1081 | 1568 | 1079 | 1466 |
| 1082 | 1546 | 1081 | 1482 |
| 1084 | 1543 | 1082 | 1497 |
| 1085 | 1519 | 1084 | 1488 |
| 1086 | 1485 | 1085 | 1474 |
| 1088 | 1464 | 1086 | 1462 |
| 1089 | 1437 | 1088 | 1431 |

|      |      |      |      |
|------|------|------|------|
| 1091 | 1391 | 1089 | 1431 |
| 1092 | 1413 | 1091 | 1423 |
| 1094 | 1368 | 1092 | 1423 |
| 1095 | 1395 | 1093 | 1451 |
| 1096 | 1407 | 1095 | 1461 |
| 1098 | 1409 | 1096 | 1484 |
| 1099 | 1446 | 1098 | 1515 |
| 1101 | 1466 | 1099 | 1517 |
| 1102 | 1448 | 1101 | 1493 |
| 1103 | 1413 | 1102 | 1462 |
| 1105 | 1381 | 1103 | 1404 |
| 1106 | 1300 | 1105 | 1348 |
| 1108 | 1259 | 1106 | 1280 |
| 1109 | 1163 | 1108 | 1189 |
| 1110 | 1077 | 1109 | 1109 |
| 1112 | 1019 | 1110 | 1037 |
| 1113 | 955  | 1112 | 991  |
| 1115 | 946  | 1113 | 974  |
| 1116 | 959  | 1115 | 975  |
| 1118 | 1005 | 1116 | 1011 |
| 1119 | 1115 | 1118 | 1108 |
| 1120 | 1288 | 1119 | 1215 |
| 1122 | 1455 | 1120 | 1375 |
| 1123 | 1752 | 1122 | 1588 |
| 1125 | 2081 | 1123 | 1773 |
| 1126 | 2438 | 1125 | 1937 |
| 1127 | 2870 | 1126 | 2075 |
| 1129 | 3315 | 1127 | 2192 |
| 1130 | 3684 | 1129 | 2252 |
| 1132 | 3767 | 1130 | 2206 |
| 1133 | 3477 | 1132 | 1992 |
| 1134 | 2842 | 1133 | 1608 |
| 1136 | 2084 | 1134 | 1146 |
| 1137 | 1355 | 1136 | 714  |
| 1139 | 788  | 1137 | 391  |
| 1140 | 401  | 1139 | 173  |
| 1141 | 165  | 1140 | 38   |
| 1143 | 27   | 1141 | -15  |
| 1144 | 1    | 1143 | 1    |
| 1146 | 21   | 1144 | 8    |
| 1147 | 9    | 1146 | 11   |
| 1149 | 28   | 1147 | 61   |
| 1150 | 105  | 1148 | 159  |
| 1151 | 220  | 1150 | 269  |
| 1153 | 311  | 1151 | 370  |
| 1154 | 393  | 1153 | 480  |
| 1156 | 470  | 1154 | 574  |
| 1157 | 508  | 1155 | 619  |
| 1158 | 512  | 1157 | 626  |
| 1160 | 503  | 1158 | 598  |

|      |      |
|------|------|
| 1161 | 486  |
| 1163 | 505  |
| 1164 | 559  |
| 1165 | 662  |
| 1167 | 789  |
| 1168 | 961  |
| 1170 | 1129 |
| 1171 | 1245 |
| 1172 | 1271 |
| 1174 | 1196 |
| 1175 | 1083 |
| 1177 | 942  |
| 1178 | 791  |
| 1179 | 714  |
| 1181 | 653  |
| 1182 | 595  |
| 1184 | 562  |
| 1185 | 546  |
| 1186 | 560  |
| 1188 | 556  |
| 1189 | 623  |
| 1191 | 676  |
| 1192 | 739  |
| 1193 | 829  |
| 1195 | 937  |
| 1196 | 1024 |
| 1197 | 1188 |
| 1199 | 1310 |
| 1200 | 1512 |
| 1202 | 1718 |
| 1203 | 1905 |
| 1204 | 2066 |
| 1206 | 2170 |
| 1207 | 2253 |
| 1209 | 2250 |
| 1210 | 2192 |
| 1211 | 2126 |
| 1213 | 2090 |
| 1214 | 2070 |
| 1216 | 2078 |
| 1217 | 2114 |
| 1218 | 2147 |
| 1220 | 2259 |
| 1221 | 2372 |
| 1223 | 2489 |
| 1224 | 2603 |
| 1225 | 2745 |
| 1227 | 2841 |
| 1228 | 2948 |
| 1230 | 3088 |

|      |      |
|------|------|
| 1160 | 573  |
| 1161 | 570  |
| 1163 | 590  |
| 1164 | 634  |
| 1165 | 710  |
| 1167 | 840  |
| 1168 | 993  |
| 1170 | 1132 |
| 1171 | 1208 |
| 1172 | 1206 |
| 1174 | 1147 |
| 1175 | 1038 |
| 1177 | 945  |
| 1178 | 887  |
| 1179 | 835  |
| 1181 | 792  |
| 1182 | 766  |
| 1183 | 761  |
| 1185 | 762  |
| 1186 | 790  |
| 1188 | 853  |
| 1189 | 912  |
| 1190 | 991  |
| 1192 | 1098 |
| 1193 | 1195 |
| 1195 | 1322 |
| 1196 | 1461 |
| 1197 | 1629 |
| 1199 | 1851 |
| 1200 | 2077 |
| 1202 | 2306 |
| 1203 | 2506 |
| 1204 | 2668 |
| 1206 | 2769 |
| 1207 | 2774 |
| 1209 | 2719 |
| 1210 | 2661 |
| 1211 | 2615 |
| 1213 | 2585 |
| 1214 | 2589 |
| 1216 | 2605 |
| 1217 | 2673 |
| 1218 | 2790 |
| 1220 | 2914 |
| 1221 | 3046 |
| 1223 | 3197 |
| 1224 | 3343 |
| 1225 | 3471 |
| 1227 | 3629 |
| 1228 | 3756 |

|      |      |      |      |
|------|------|------|------|
| 1231 | 3145 | 1229 | 3862 |
| 1232 | 3242 | 1231 | 3979 |
| 1234 | 3319 | 1232 | 4100 |
| 1235 | 3428 | 1234 | 4180 |
| 1236 | 3439 | 1235 | 4236 |
| 1238 | 3501 | 1236 | 4317 |
| 1239 | 3556 | 1238 | 4371 |
| 1241 | 3580 | 1239 | 4407 |
| 1242 | 3609 | 1241 | 4446 |
| 1243 | 3642 | 1242 | 4473 |
| 1245 | 3649 | 1243 | 4485 |
| 1246 | 3666 | 1245 | 4495 |
| 1248 | 3669 | 1246 | 4486 |
| 1249 | 3651 | 1247 | 4464 |
| 1250 | 3642 | 1249 | 4470 |
| 1252 | 3670 | 1250 | 4471 |
| 1253 | 3655 | 1252 | 4448 |
| 1254 | 3644 | 1253 | 4451 |
| 1256 | 3676 | 1254 | 4467 |
| 1257 | 3691 | 1256 | 4465 |
| 1259 | 3694 | 1257 | 4470 |
| 1260 | 3725 | 1259 | 4472 |
| 1261 | 3710 | 1260 | 4476 |
| 1263 | 3753 | 1261 | 4519 |
| 1264 | 3802 | 1263 | 4529 |
| 1266 | 3786 | 1264 | 4511 |
| 1267 | 3782 | 1265 | 4520 |
| 1268 | 3807 | 1267 | 4529 |
| 1270 | 3805 | 1268 | 4519 |
| 1271 | 3794 | 1270 | 4487 |
| 1272 | 3771 | 1271 | 4472 |
| 1274 | 3793 | 1272 | 4467 |
| 1275 | 3795 | 1274 | 4422 |
| 1277 | 3751 | 1275 | 4401 |
| 1278 | 3805 | 1277 | 4414 |
| 1279 | 3824 | 1278 | 4410 |
| 1281 | 3861 | 1279 | 4407 |
| 1282 | 3899 | 1281 | 4416 |
| 1283 | 3978 | 1282 | 4447 |
| 1285 | 4083 | 1283 | 4473 |
| 1286 | 4224 | 1285 | 4525 |
| 1288 | 4509 | 1286 | 4613 |
| 1289 | 4964 | 1288 | 4761 |
| 1290 | 5747 | 1289 | 5028 |
| 1292 | 6803 | 1290 | 5412 |
| 1293 | 7909 | 1292 | 5943 |
| 1294 | 8699 | 1293 | 6508 |
| 1296 | 8790 | 1294 | 6856 |
| 1297 | 8288 | 1296 | 6826 |
| 1299 | 7470 | 1297 | 6538 |

|      |      |      |      |
|------|------|------|------|
| 1300 | 6683 | 1299 | 6227 |
| 1301 | 6089 | 1300 | 6005 |
| 1303 | 5737 | 1301 | 5891 |
| 1304 | 5549 | 1303 | 5859 |
| 1305 | 5464 | 1304 | 5865 |
| 1307 | 5418 | 1305 | 5871 |
| 1308 | 5365 | 1307 | 5876 |
| 1310 | 5337 | 1308 | 5873 |
| 1311 | 5291 | 1310 | 5878 |
| 1312 | 5274 | 1311 | 5868 |
| 1314 | 5224 | 1312 | 5837 |
| 1315 | 5167 | 1314 | 5798 |
| 1316 | 5112 | 1315 | 5756 |
| 1318 | 5058 | 1316 | 5692 |
| 1319 | 4976 | 1318 | 5610 |
| 1321 | 4891 | 1319 | 5539 |
| 1322 | 4846 | 1321 | 5462 |
| 1323 | 4754 | 1322 | 5362 |
| 1325 | 4682 | 1323 | 5281 |
| 1326 | 4629 | 1325 | 5236 |
| 1327 | 4620 | 1326 | 5209 |
| 1329 | 4604 | 1327 | 5191 |
| 1330 | 4608 | 1329 | 5197 |
| 1332 | 4635 | 1330 | 5214 |
| 1333 | 4658 | 1331 | 5227 |
| 1334 | 4669 | 1333 | 5265 |
| 1336 | 4723 | 1334 | 5308 |
| 1337 | 4734 | 1336 | 5317 |
| 1338 | 4718 | 1337 | 5308 |
| 1340 | 4679 | 1338 | 5291 |
| 1341 | 4632 | 1340 | 5243 |
| 1342 | 4520 | 1341 | 5135 |
| 1344 | 4374 | 1342 | 4985 |
| 1345 | 4190 | 1344 | 4792 |
| 1347 | 3980 | 1345 | 4589 |
| 1348 | 3790 | 1347 | 4369 |
| 1349 | 3568 | 1348 | 4144 |
| 1351 | 3386 | 1349 | 3954 |
| 1352 | 3232 | 1351 | 3775 |
| 1353 | 3084 | 1352 | 3597 |
| 1355 | 2940 | 1353 | 3459 |
| 1356 | 2862 | 1355 | 3359 |
| 1358 | 2790 | 1356 | 3263 |
| 1359 | 2719 | 1357 | 3179 |
| 1360 | 2656 | 1359 | 3112 |
| 1362 | 2622 | 1360 | 3058 |
| 1363 | 2586 | 1362 | 3006 |
| 1364 | 2565 | 1363 | 2972 |
| 1366 | 2563 | 1364 | 2962 |
| 1367 | 2574 | 1366 | 2929 |

|      |      |      |      |
|------|------|------|------|
| 1368 | 2518 | 1367 | 2891 |
| 1370 | 2472 | 1368 | 2852 |
| 1371 | 2397 | 1370 | 2769 |
| 1372 | 2272 | 1371 | 2677 |
| 1374 | 2186 | 1372 | 2613 |
| 1375 | 2119 | 1374 | 2547 |
| 1377 | 2044 | 1375 | 2477 |
| 1378 | 1986 | 1377 | 2432 |
| 1379 | 1957 | 1378 | 2398 |
| 1381 | 1920 | 1379 | 2373 |
| 1382 | 1906 | 1381 | 2349 |
| 1383 | 1864 | 1382 | 2350 |
| 1385 | 1887 | 1383 | 2359 |
| 1386 | 1861 | 1385 | 2342 |
| 1387 | 1835 | 1386 | 2353 |
| 1389 | 1849 | 1387 | 2372 |
| 1390 | 1839 | 1389 | 2373 |
| 1392 | 1828 | 1390 | 2379 |
| 1393 | 1836 | 1391 | 2381 |
| 1394 | 1827 | 1393 | 2364 |
| 1396 | 1809 | 1394 | 2352 |
| 1397 | 1815 | 1396 | 2360 |
| 1398 | 1839 | 1397 | 2371 |
| 1400 | 1856 | 1398 | 2366 |
| 1401 | 1864 | 1400 | 2362 |
| 1402 | 1889 | 1401 | 2357 |
| 1404 | 1908 | 1402 | 2351 |
| 1405 | 1935 | 1404 | 2335 |
| 1406 | 1957 | 1405 | 2332 |
| 1408 | 2019 | 1406 | 2360 |
| 1409 | 2117 | 1408 | 2402 |
| 1411 | 2238 | 1409 | 2446 |
| 1412 | 2394 | 1410 | 2509 |
| 1413 | 2615 | 1412 | 2605 |
| 1415 | 2886 | 1413 | 2728 |
| 1416 | 3157 | 1414 | 2870 |
| 1417 | 3387 | 1416 | 3011 |
| 1419 | 3525 | 1417 | 3122 |
| 1420 | 3583 | 1419 | 3225 |
| 1421 | 3642 | 1420 | 3311 |
| 1423 | 3680 | 1421 | 3385 |
| 1424 | 3764 | 1423 | 3476 |
| 1425 | 3910 | 1424 | 3610 |
| 1427 | 4175 | 1425 | 3797 |
| 1428 | 4519 | 1427 | 4049 |
| 1429 | 5005 | 1428 | 4384 |
| 1431 | 5611 | 1429 | 4817 |
| 1432 | 6397 | 1431 | 5382 |
| 1433 | 7353 | 1432 | 6036 |
| 1435 | 8373 | 1433 | 6759 |

|      |       |      |      |
|------|-------|------|------|
| 1436 | 9419  | 1435 | 7514 |
| 1438 | 10329 | 1436 | 8201 |
| 1439 | 10927 | 1437 | 8750 |
| 1440 | 11204 | 1439 | 9108 |
| 1442 | 11163 | 1440 | 9305 |
| 1443 | 11012 | 1441 | 9385 |
| 1444 | 10764 | 1443 | 9423 |
| 1446 | 10605 | 1444 | 9455 |
| 1447 | 10432 | 1446 | 9480 |
| 1448 | 10325 | 1447 | 9508 |
| 1450 | 10231 | 1448 | 9473 |
| 1451 | 10120 | 1450 | 9379 |
| 1452 | 10036 | 1451 | 9252 |
| 1454 | 9977  | 1452 | 9086 |
| 1455 | 9887  | 1454 | 8891 |
| 1456 | 9777  | 1455 | 8731 |
| 1458 | 9724  | 1456 | 8603 |
| 1459 | 9606  | 1458 | 8435 |
| 1460 | 9408  | 1459 | 8264 |
| 1462 | 9178  | 1460 | 8065 |
| 1463 | 8820  | 1462 | 7789 |
| 1464 | 8363  | 1463 | 7432 |
| 1466 | 7818  | 1464 | 6999 |
| 1467 | 7223  | 1466 | 6502 |
| 1468 | 6566  | 1467 | 5964 |
| 1470 | 5923  | 1468 | 5423 |
| 1471 | 5299  | 1470 | 4896 |
| 1472 | 4716  | 1471 | 4388 |
| 1474 | 4171  | 1472 | 3917 |
| 1475 | 3703  | 1474 | 3487 |
| 1477 | 3279  | 1475 | 3097 |
| 1478 | 2922  | 1476 | 2760 |
| 1479 | 2607  | 1478 | 2468 |
| 1481 | 2335  | 1479 | 2230 |
| 1482 | 2123  | 1480 | 2028 |
| 1483 | 1913  | 1482 | 1848 |
| 1485 | 1744  | 1483 | 1687 |
| 1486 | 1575  | 1484 | 1525 |
| 1487 | 1402  | 1486 | 1372 |
| 1489 | 1261  | 1487 | 1236 |
| 1490 | 1119  | 1488 | 1104 |
| 1491 | 988   | 1490 | 978  |
| 1493 | 866   | 1491 | 849  |
| 1494 | 741   | 1493 | 718  |
| 1495 | 622   | 1494 | 613  |
| 1497 | 544   | 1495 | 532  |
| 1498 | 475   | 1497 | 447  |
| 1499 | 392   | 1498 | 380  |
| 1501 | 352   | 1499 | 325  |
| 1502 | 297   | 1501 | 266  |



|      |     |      |     |
|------|-----|------|-----|
| 1503 | 258 | 1502 | 226 |
| 1505 | 230 | 1503 | 186 |
| 1506 | 190 | 1505 | 149 |
| 1507 | 161 | 1506 | 126 |
| 1509 | 142 | 1507 | 105 |
| 1510 | 119 | 1509 | 78  |
| 1511 | 91  | 1510 | 56  |
| 1513 | 74  | 1511 | 33  |
| 1514 | 46  | 1513 | 12  |
| 1515 | 36  | 1514 | 13  |
| 1517 | 39  | 1515 | 5   |
| 1518 | 13  | 1517 | -11 |
| 1519 | 6   | 1518 | -10 |
| 1521 | 9   | 1519 | -10 |
| 1522 | -1  | 1521 | -7  |
| 1523 | 7   | 1522 | 1   |
| 1525 | 2   | 1523 | -3  |
| 1526 | -7  | 1525 | 7   |
| 1527 | 7   | 1526 | 23  |
| 1529 | 13  | 1527 | 41  |
| 1530 | 22  | 1529 | 58  |
| 1531 | 35  | 1530 | 80  |
| 1533 | 51  | 1531 | 92  |
| 1534 | 53  | 1533 | 98  |
| 1535 | 63  | 1534 | 118 |
| 1537 | 89  | 1535 | 150 |
| 1538 | 123 | 1537 | 182 |
| 1539 | 150 | 1538 | 210 |
| 1541 | 183 | 1539 | 248 |
| 1542 | 229 | 1540 | 303 |
| 1543 | 293 | 1542 | 373 |
| 1545 | 365 | 1543 | 440 |
| 1546 | 418 | 1544 | 500 |
| 1547 | 470 | 1546 | 566 |
| 1549 | 525 | 1547 | 638 |
| 1550 | 581 | 1548 | 706 |
| 1551 | 629 | 1550 | 778 |
| 1553 | 682 | 1551 | 834 |
| 1554 | 693 | 1552 | 871 |
| 1555 | 701 | 1554 | 900 |
| 1557 | 691 | 1555 | 910 |
| 1558 | 677 | 1556 | 887 |
| 1559 | 637 | 1558 | 854 |
| 1561 | 624 | 1559 | 830 |
| 1562 | 606 | 1560 | 820 |
| 1563 | 619 | 1562 | 831 |
| 1564 | 636 | 1563 | 851 |
| 1566 | 665 | 1564 | 862 |
| 1567 | 675 | 1566 | 891 |
| 1568 | 728 | 1567 | 932 |

|      |      |      |      |
|------|------|------|------|
| 1570 | 757  | 1568 | 980  |
| 1571 | 820  | 1570 | 1044 |
| 1572 | 876  | 1571 | 1101 |
| 1574 | 920  | 1572 | 1135 |
| 1575 | 938  | 1574 | 1181 |
| 1576 | 986  | 1575 | 1229 |
| 1578 | 1016 | 1576 | 1260 |
| 1579 | 1041 | 1578 | 1298 |
| 1580 | 1088 | 1579 | 1348 |
| 1582 | 1132 | 1580 | 1405 |
| 1583 | 1182 | 1582 | 1471 |
| 1584 | 1205 | 1583 | 1519 |
| 1586 | 1195 | 1584 | 1540 |
| 1587 | 1170 | 1586 | 1502 |
| 1588 | 1109 | 1587 | 1428 |
| 1590 | 1073 | 1588 | 1349 |
| 1591 | 1036 | 1589 | 1306 |
| 1592 | 1056 | 1591 | 1311 |
| 1594 | 1098 | 1592 | 1342 |
| 1595 | 1149 | 1593 | 1398 |
| 1596 | 1227 | 1595 | 1468 |
| 1598 | 1314 | 1596 | 1556 |
| 1599 | 1429 | 1597 | 1667 |
| 1600 | 1569 | 1599 | 1811 |
| 1601 | 1731 | 1600 | 1991 |
| 1603 | 1901 | 1601 | 2178 |
| 1604 | 2013 | 1603 | 2333 |
| 1605 | 2088 | 1604 | 2420 |
| 1607 | 2090 | 1605 | 2432 |
| 1608 | 2080 | 1607 | 2395 |
| 1609 | 2057 | 1608 | 2337 |
| 1611 | 2043 | 1609 | 2290 |
| 1612 | 2043 | 1611 | 2289 |
| 1613 | 2074 | 1612 | 2339 |
| 1615 | 2128 | 1613 | 2402 |
| 1616 | 2154 | 1615 | 2436 |
| 1617 | 2148 | 1616 | 2449 |
| 1619 | 2132 | 1617 | 2444 |
| 1620 | 2102 | 1618 | 2419 |
| 1621 | 2064 | 1620 | 2379 |
| 1623 | 2029 | 1621 | 2346 |
| 1624 | 2004 | 1622 | 2324 |
| 1625 | 1998 | 1624 | 2314 |
| 1626 | 2002 | 1625 | 2338 |
| 1628 | 2053 | 1626 | 2397 |
| 1629 | 2121 | 1628 | 2462 |
| 1630 | 2192 | 1629 | 2528 |
| 1632 | 2261 | 1630 | 2596 |
| 1633 | 2344 | 1632 | 2689 |
| 1634 | 2454 | 1633 | 2791 |

|      |      |      |      |
|------|------|------|------|
| 1636 | 2564 | 1634 | 2896 |
| 1637 | 2679 | 1636 | 3006 |
| 1638 | 2798 | 1637 | 3121 |
| 1640 | 2929 | 1638 | 3250 |
| 1641 | 3085 | 1639 | 3379 |
| 1642 | 3221 | 1641 | 3514 |
| 1643 | 3392 | 1642 | 3671 |
| 1645 | 3570 | 1643 | 3855 |
| 1646 | 3778 | 1645 | 4051 |
| 1647 | 3986 | 1646 | 4246 |
| 1649 | 4177 | 1647 | 4447 |
| 1650 | 4380 | 1649 | 4676 |
| 1651 | 4593 | 1650 | 4899 |
| 1653 | 4765 | 1651 | 5082 |
| 1654 | 4893 | 1653 | 5265 |
| 1655 | 5044 | 1654 | 5436 |
| 1657 | 5142 | 1655 | 5560 |
| 1658 | 5209 | 1656 | 5642 |
| 1659 | 5242 | 1658 | 5674 |
| 1660 | 5231 | 1659 | 5685 |
| 1662 | 5245 | 1660 | 5654 |
| 1663 | 5181 | 1662 | 5599 |
| 1664 | 5165 | 1663 | 5565 |
| 1666 | 5130 | 1664 | 5503 |
| 1667 | 5069 | 1666 | 5445 |
| 1668 | 5031 | 1667 | 5403 |
| 1670 | 4984 | 1668 | 5331 |
| 1671 | 4881 | 1669 | 5247 |
| 1672 | 4799 | 1671 | 5159 |
| 1674 | 4684 | 1672 | 5056 |
| 1675 | 4580 | 1673 | 4951 |
| 1676 | 4462 | 1675 | 4821 |
| 1677 | 4321 | 1676 | 4673 |
| 1679 | 4178 | 1677 | 4525 |
| 1680 | 4030 | 1679 | 4390 |
| 1681 | 3914 | 1680 | 4257 |
| 1683 | 3769 | 1681 | 4108 |
| 1684 | 3620 | 1683 | 3964 |
| 1685 | 3489 | 1684 | 3831 |
| 1687 | 3351 | 1685 | 3680 |
| 1688 | 3193 | 1686 | 3526 |
| 1689 | 3042 | 1688 | 3368 |
| 1690 | 2889 | 1689 | 3208 |
| 1692 | 2731 | 1690 | 3031 |
| 1693 | 2554 | 1692 | 2841 |
| 1694 | 2377 | 1693 | 2656 |
| 1696 | 2209 | 1694 | 2471 |
| 1697 | 2043 | 1696 | 2296 |
| 1698 | 1893 | 1697 | 2112 |
| 1700 | 1719 | 1698 | 1918 |

|      |      |      |      |
|------|------|------|------|
| 1701 | 1559 | 1699 | 1735 |
| 1702 | 1408 | 1701 | 1558 |
| 1703 | 1266 | 1702 | 1397 |
| 1705 | 1140 | 1703 | 1253 |
| 1706 | 1035 | 1705 | 1118 |
| 1707 | 928  | 1706 | 993  |
| 1709 | 833  | 1707 | 872  |
| 1710 | 740  | 1709 | 785  |
| 1711 | 691  | 1710 | 709  |
| 1713 | 622  | 1711 | 630  |
| 1714 | 567  | 1712 | 574  |
| 1715 | 531  | 1714 | 521  |
| 1716 | 480  | 1715 | 470  |
| 1718 | 448  | 1716 | 435  |
| 1719 | 421  | 1718 | 406  |
| 1720 | 397  | 1719 | 377  |
| 1722 | 368  | 1720 | 357  |
| 1723 | 356  | 1721 | 333  |
| 1724 | 326  | 1723 | 308  |
| 1725 | 305  | 1724 | 288  |
| 1727 | 286  | 1725 | 275  |
| 1728 | 275  | 1727 | 261  |
| 1729 | 254  | 1728 | 253  |
| 1731 | 252  | 1729 | 243  |
| 1732 | 230  | 1731 | 235  |
| 1733 | 228  | 1732 | 226  |
| 1735 | 209  | 1733 | 210  |
| 1736 | 192  | 1734 | 198  |
| 1737 | 182  | 1736 | 201  |
| 1738 | 188  | 1737 | 198  |
| 1740 | 170  | 1738 | 180  |
| 1741 | 151  | 1740 | 166  |
| 1742 | 145  | 1741 | 157  |
| 1744 | 127  | 1742 | 150  |
| 1745 | 128  | 1743 | 145  |
| 1746 | 118  | 1745 | 133  |
| 1747 | 104  | 1746 | 118  |
| 1749 | 93   | 1747 | 98   |
| 1750 | 72   | 1749 | 79   |
| 1751 | 59   | 1750 | 70   |
| 1753 | 59   | 1751 | 59   |
| 1754 | 41   | 1752 | 50   |
| 1755 | 47   | 1754 | 51   |
| 1756 | 44   | 1755 | 31   |
| 1758 | 18   | 1756 | 15   |
| 1759 | 17   | 1758 | 10   |
| 1760 | 8    | 1759 | 5    |
| 1762 | 10   | 1760 | 5    |
| 1763 | 6    | 1761 | -3   |
| 1764 | -6   | 1763 | -3   |

|      |     |      |    |
|------|-----|------|----|
| 1765 | 3   | 1764 | 2  |
| 1767 | 3   | 1765 | 3  |
| 1768 | -1  | 1767 | 3  |
| 1769 | 2   | 1768 | 7  |
| 1771 | 2   | 1769 | 9  |
| 1772 | 3   | 1770 | 15 |
| 1773 | 7   | 1772 | 14 |
| 1774 | 3   | 1773 | 19 |
| 1776 | 9   | 1774 | 17 |
| 1777 | 1   | 1776 | 18 |
| 1778 | 7   | 1777 | 29 |
| 1780 | 17  | 1778 | 34 |
| 1781 | 15  | 1779 | 23 |
| 1782 | 0   | 1781 | 5  |
| 1783 | -12 | 1782 | 8  |
| 1785 | 3   | 1783 | 24 |
| 1786 | 14  | 1785 | 24 |
| 1787 | 3   | 1786 | 17 |
| 1789 | 4   | 1787 | 21 |
| 1790 | 11  | 1788 | 27 |
| 1791 | 15  | 1790 | 20 |
| 1792 | 4   | 1791 | 17 |
| 1794 | 9   | 1792 | 20 |
| 1795 | 7   | 1794 | 13 |
| 1796 | 3   | 1795 | 10 |
| 1798 | 3   | 1796 | 11 |
| 1799 | 7   | 1797 | 4  |
| 1800 | -1  | 1799 | 0  |
| 1801 | 0   | 1800 | 0  |
