# Supplementary material for: Novel diagnostic and therapeutic techniques reveal changed metabolic profiles in recurrent focal segmental glomerulosclerosis
Source: Springer Nature journal article supplement (doi:10.1038/s41598-021-83883-w), 2021-02-25
Supplement: MOESM5 [file 41598_2021_83883_MOESM5_ESM.pdf]

all values are given as Log2 (patient / control sample)

| Analyte     | Metabolite class     | before 1. CytoSorb | after 1. CytoSorb | before CytoSorb at time of remission | after CytoSorb at time of remission | Difference FSGS recurrence-FSGS remission | p-Value (paired, 2-sided) | minus log 10 p-Value (paired, 2-sided) |
|-------------|----------------------|--------------------|-------------------|--------------------------------------|-------------------------------------|-------------------------------------------|---------------------------|----------------------------------------|
| C0          | acylcarnitines       | -1,76              | -1,69             | -0,45                                | -0,34                               | 1,33                                      | 0,009                     | 2,070                                  |
| PC ae C44:5 | glycerophospholipids | -0,21              | -0,25             | -0,59                                | -0,64                               | -0,38                                     | 0,009                     | 2,043                                  |
| PC aa C40:5 | glycerophospholipids | 0,33               | 0,34              | 0,17                                 | 0,18                                | -0,16                                     | 0,011                     | 1,975                                  |
| PC ae C34:0 | glycerophospholipids | 0,26               | 0,28              | -0,01                                | 0,01                                | -0,27                                     | 0,011                     | 1,963                                  |
| PC aa C36:1 | glycerophospholipids | -0,19              | -0,20             | 0,18                                 | 0,19                                | 0,38                                      | 0,016                     | 1,801                                  |
| SM C16:0    | sphingolipids        | -0,08              | -0,16             | 0,07                                 | -0,01                               | 0,15                                      | 0,016                     | 1,791                                  |
| PC ae C38:6 | glycerophospholipids | 0,19               | 0,16              | 0,34                                 | 0,31                                | 0,15                                      | 0,017                     | 1,777                                  |
| PC aa C38:0 | glycerophospholipids | -0,32              | -0,32             | 0,08                                 | 0,06                                | 0,39                                      | 0,017                     | 1,761                                  |
| PC ae C42:4 | glycerophospholipids | -0,11              | -0,19             | -0,32                                | -0,40                               | -0,21                                     | 0,018                     | 1,737                                  |
| PC aa C40:6 | glycerophospholipids | -0,37              | -0,37             | -0,14                                | -0,13                               | 0,24                                      | 0,019                     | 1,722                                  |
| PC ae C40:6 | glycerophospholipids | -0,14              | -0,14             | -0,08                                | -0,08                               | 0,06                                      | 0,025                     | 1,606                                  |
| PC ae C38:0 | glycerophospholipids | -0,05              | -0,05             | -0,16                                | -0,14                               | -0,10                                     | 0,027                     | 1,575                                  |
| Pro         | aminoacids           | 0,56               | 0,64              | 0,92                                 | 0,97                                | 0,35                                      | 0,027                     | 1,575                                  |
| PC aa C32:2 | glycerophospholipids | 0,65               | 0,79              | 0,15                                 | 0,34                                | -0,47                                     | 0,027                     | 1,571                                  |
| PC aa C34:4 | glycerophospholipids | 0,67               | 0,79              | 0,00                                 | 0,06                                | -0,70                                     | 0,029                     | 1,543                                  |
| PC ae C30:0 | glycerophospholipids | 0,26               | 0,26              | -0,06                                | -0,03                               | -0,30                                     | 0,029                     | 1,536                                  |
| PC aa C36:6 | glycerophospholipids | 0,44               | 0,41              | -0,03                                | -0,02                               | -0,45                                     | 0,030                     | 1,517                                  |
| PC aa C34:3 | glycerophospholipids | 0,30               | 0,38              | 0,15                                 | 0,21                                | -0,16                                     | 0,031                     | 1,510                                  |
| PC aa C32:1 | glycerophospholipids | 0,13               | 0,34              | -0,24                                | -0,07                               | -0,39                                     | 0,033                     | 1,482                                  |
| PC aa C40:2 | glycerophospholipids | -0,19              | -0,42             | -0,26                                | -0,48                               | -0,06                                     | 0,046                     | 1,334                                  |
| PC aa C38:4 | glycerophospholipids | 0,20               | 0,26              | -0,14                                | -0,13                               | -0,36                                     | 0,046                     | 1,333                                  |
| PC ae C36:5 | glycerophospholipids | 0,44               | 0,33              | 0,63                                 | 0,55                                | 0,21                                      | 0,048                     | 1,321                                  |
| PC aa C38:5 | glycerophospholipids | 0,23               | 0,28              | -0,02                                | -0,01                               | -0,27                                     | 0,051                     | 1,296                                  |
| PC aa C36:2 | glycerophospholipids | -0,06              | 0,00              | 0,23                                 | 0,25                                | 0,27                                      | 0,056                     | 1,253                                  |
| PC ae C38:4 | glycerophospholipids | 0,12               | 0,08              | -0,25                                | -0,22                               | -0,34                                     | 0,056                     | 1,252                                  |
| PC aa C32:0 | glycerophospholipids | 0,19               | 0,24              | 0,27                                 | 0,30                                | 0,07                                      | 0,057                     | 1,244                                  |
| PC aa C38:6 | glycerophospholipids | -0,23              | -0,19             | -0,07                                | -0,05                               | 0,15                                      | 0,059                     | 1,227                                  |

|               |                |       |       |       |       |       |       |       |
|---------------|----------------|-------|-------|-------|-------|-------|-------|-------|
| PC aa C36:5   | glycerophosph  | 0,33  | 0,41  | 0,00  | 0,00  | -0,38 | 0,064 | 1,196 |
| PC aa C38:3   | glycerophosph  | 0,00  | 0,04  | -0,21 | -0,13 | -0,19 | 0,068 | 1,167 |
| PC ae C40:4   | glycerophosph  | -0,15 | -0,10 | -0,30 | -0,28 | -0,16 | 0,071 | 1,149 |
| Total SM-non  | Cust. Met. Inc | -0,11 | -0,19 | 0,01  | -0,04 | 0,13  | 0,076 | 1,117 |
| PC ae C34:2   | glycerophosph  | 0,45  | 0,44  | 0,53  | 0,55  | 0,10  | 0,079 | 1,100 |
| Total SM      | Cust. Met. Inc | -0,09 | -0,17 | 0,02  | -0,02 | 0,13  | 0,086 | 1,066 |
| SM C24:1      | sphingolipids  | -0,11 | -0,17 | 0,05  | 0,04  | 0,19  | 0,091 | 1,043 |
| Tyr           | aminoacids     | -0,19 | -0,54 | 0,13  | -0,11 | 0,37  | 0,091 | 1,039 |
| PC aa C36:0   | glycerophosph  | -0,22 | 0,07  | 0,47  | 0,56  | 0,59  | 0,102 | 0,993 |
| SM C24:0      | sphingolipids  | -0,22 | -0,22 | -0,01 | 0,07  | 0,26  | 0,105 | 0,978 |
| PC aa C28:1   | glycerophosph  | 0,39  | 0,42  | 0,48  | 0,48  | 0,08  | 0,106 | 0,975 |
| PC aa C24:0   | glycerophosph  | -0,15 | 0,27  | -1,10 | -0,41 | -0,82 | 0,107 | 0,969 |
| SM C26:0      | sphingolipids  | -0,66 | -0,33 | 0,31  | 0,34  | 0,82  | 0,114 | 0,943 |
| PC ae C40:3   | glycerophosph  | -0,08 | -0,07 | -0,16 | -0,12 | -0,06 | 0,116 | 0,935 |
| PC ae C40:5   | glycerophosph  | -0,08 | -0,14 | -0,28 | -0,28 | -0,16 | 0,117 | 0,933 |
| PC aa C42:1   | glycerophosph  | -0,03 | -0,11 | -0,11 | -0,23 | -0,10 | 0,123 | 0,911 |
| PC ae C38:3   | glycerophosph  | 0,30  | 0,24  | -0,02 | 0,03  | -0,26 | 0,130 | 0,886 |
| PC aa C36:4   | glycerophosph  | 0,19  | 0,26  | 0,06  | 0,06  | -0,17 | 0,132 | 0,879 |
| SM (OH) C22:  | sphingolipids  | -0,19 | -0,27 | 0,02  | 0,05  | 0,26  | 0,137 | 0,862 |
| PC ae C34:3   | glycerophosph  | 0,73  | 0,57  | 0,95  | 0,91  | 0,28  | 0,144 | 0,840 |
| PC ae C36:0   | glycerophosph  | -0,61 | -0,53 | -0,20 | -0,27 | 0,33  | 0,145 | 0,840 |
| PC aa C34:1   | glycerophosph  | -0,21 | -0,10 | 0,07  | 0,07  | 0,22  | 0,158 | 0,800 |
| PC aa C30:0   | glycerophosph  | 0,28  | 0,44  | 0,17  | 0,27  | -0,14 | 0,161 | 0,792 |
| SM (OH) C24:  | sphingolipids  | -0,38 | -0,53 | -0,20 | -0,22 | 0,24  | 0,164 | 0,785 |
| C2            | acylcarnitines | -0,98 | -1,78 | -0,25 | -0,52 | 0,99  | 0,169 | 0,771 |
| PC aa C40:3   | glycerophosph  | 0,03  | 0,16  | 0,25  | 0,29  | 0,18  | 0,171 | 0,767 |
| PC ae C36:4   | glycerophosph  | 0,29  | 0,29  | 0,30  | 0,30  | 0,01  | 0,175 | 0,757 |
| Orn / Arg     | Cust. Met. Inc | 1,23  | 1,47  | 0,77  | 0,62  | -0,65 | 0,188 | 0,725 |
| PC ae C34:1   | glycerophosph  | -0,03 | -0,05 | -0,13 | -0,10 | -0,07 | 0,188 | 0,725 |
| PC ae C44:6   | glycerophosph  | -0,40 | -0,44 | -0,68 | -0,59 | -0,21 | 0,191 | 0,719 |
| PC aa C32:3   | glycerophosph  | 0,40  | 0,33  | 0,09  | 0,16  | -0,24 | 0,191 | 0,718 |
| xLeu          | aminoacids     | 0,10  | -0,32 | 0,30  | 0,11  | 0,31  | 0,228 | 0,642 |
| lysoPC a C20: | glycerophosph  | 1,04  | 0,97  | 0,54  | -0,14 | -0,80 | 0,229 | 0,641 |

|               |                |       |       |       |       |       |       |       |
|---------------|----------------|-------|-------|-------|-------|-------|-------|-------|
| PC ae C42:5   | glycerophosph  | -0,12 | -0,18 | -0,31 | -0,27 | -0,14 | 0,235 | 0,628 |
| PC ae C36:2   | glycerophosph  | 0,24  | 0,29  | 0,18  | 0,26  | -0,04 | 0,248 | 0,605 |
| SM C18:1      | sphingolipids  | -0,31 | -0,36 | -0,35 | -0,46 | -0,07 | 0,250 | 0,602 |
| SM C16:1      | sphingolipids  | -0,07 | -0,19 | 0,02  | 0,02  | 0,15  | 0,257 | 0,591 |
| lysoPC a C28: | glycerophosph  | 0,37  | 0,39  | -0,03 | 0,23  | -0,28 | 0,259 | 0,587 |
| lysoPC a C20: | glycerophosph  | 0,87  | 0,82  | 0,45  | -0,30 | -0,77 | 0,273 | 0,564 |
| SM (OH) C14:  | sphingolipids  | 0,25  | 0,11  | 0,33  | 0,34  | 0,16  | 0,276 | 0,560 |
| SM (OH) C22:  | sphingolipids  | 0,12  | 0,04  | 0,00  | 0,01  | -0,08 | 0,290 | 0,538 |
| PC ae C44:4   | glycerophosph  | -0,39 | -0,23 | -0,49 | -0,54 | -0,21 | 0,304 | 0,517 |
| PC aa C34:2   | glycerophosph  | 0,01  | 0,13  | 0,29  | 0,21  | 0,18  | 0,307 | 0,512 |
| Tyr / Phe     | Cust. Met. Inc | -0,88 | -0,51 | -0,13 | -0,28 | 0,49  | 0,312 | 0,506 |
| PC ae C38:1   | glycerophosph  | 0,46  | 0,29  | -0,35 | -2,41 | -1,76 | 0,315 | 0,502 |
| Total SM-OH   | Cust. Met. Inc | 0,04  | -0,06 | 0,08  | 0,09  | 0,10  | 0,315 | 0,502 |
| PC aa C36:3   | glycerophosph  | 0,05  | 0,10  | 0,15  | 0,13  | 0,07  | 0,320 | 0,495 |
| PC aa C42:2   | glycerophosph  | -0,22 | -0,51 | -0,07 | 0,07  | 0,37  | 0,339 | 0,470 |
| PC ae C36:3   | glycerophosph  | 0,26  | 0,25  | 0,28  | 0,33  | 0,05  | 0,345 | 0,462 |
| SM C18:0      | sphingolipids  | -0,28 | -0,29 | -0,16 | -0,26 | 0,08  | 0,351 | 0,454 |
| Ser           | aminoacids     | 0,60  | -0,07 | 0,76  | 0,60  | 0,42  | 0,353 | 0,452 |
| lysoPC a C16: | glycerophosph  | 0,27  | 0,23  | 0,15  | -0,57 | -0,46 | 0,402 | 0,396 |
| C2 / C0       | Cust. Met. Inc | 0,52  | 0,00  | 0,12  | -0,06 | -0,23 | 0,403 | 0,395 |
| Arg           | aminoacids     | -0,41 | -0,93 | -0,24 | 0,22  | 0,66  | 0,403 | 0,394 |
| C4:1          | acylcarnitines | 0,00  | 0,59  | -0,10 | -0,19 | -0,44 | 0,421 | 0,376 |
| His           | aminoacids     | -0,05 | -0,20 | 0,03  | 0,46  | 0,37  | 0,425 | 0,371 |
| Thr           | aminoacids     | 0,80  | -0,28 | 0,92  | 0,87  | 0,63  | 0,432 | 0,364 |
| lysoPC a C24: | glycerophosph  | -0,40 | -0,22 | -0,65 | -0,25 | -0,13 | 0,434 | 0,363 |
| PC ae C40:1   | glycerophosph  | 0,10  | 0,08  | 0,20  | 0,09  | 0,05  | 0,440 | 0,357 |
| PC ae C40:2   | glycerophosph  | -0,11 | 0,06  | 0,08  | 0,08  | 0,10  | 0,440 | 0,356 |
| Total SM-OH   | Cust. Met. Inc | -0,11 | 0,23  | -0,01 | 0,24  | 0,06  | 0,442 | 0,354 |
| lysoPC a C18: | glycerophosph  | 0,04  | -0,08 | 0,55  | -0,04 | 0,28  | 0,454 | 0,343 |
| SM C26:1      | sphingolipids  | -0,17 | -0,44 | -0,12 | 0,34  | 0,42  | 0,455 | 0,342 |
| lysoPC a C26: | glycerophosph  | -0,34 | -0,06 | -0,96 | -0,09 | -0,33 | 0,464 | 0,334 |
| Met           | aminoacids     | 0,25  | -0,34 | 0,28  | 0,23  | 0,30  | 0,467 | 0,331 |
| PC ae C38:2   | glycerophosph  | -0,23 | 0,15  | 0,11  | 0,17  | 0,18  | 0,469 | 0,329 |

|               |                |       |       |       |       |       |       |       |
|---------------|----------------|-------|-------|-------|-------|-------|-------|-------|
| C12:1         | acylcarnitines | -0,41 | -0,02 | -0,44 | -0,79 | -0,40 | 0,478 | 0,321 |
| PC ae C42:1   | glycerophosp   | -0,30 | -0,30 | -0,54 | -0,30 | -0,12 | 0,496 | 0,304 |
| PC aa C38:1   | glycerophosp   | 0,06  | 0,10  | 1,02  | 0,06  | 0,46  | 0,528 | 0,277 |
| lysoPC a C26: | glycerophosp   | -0,09 | -0,38 | -1,36 | -0,30 | -0,59 | 0,543 | 0,265 |
| PC ae C44:3   | glycerophosp   | 0,19  | 0,00  | -0,40 | 0,08  | -0,26 | 0,581 | 0,236 |
| lysoPC a C17: | glycerophosp   | 0,56  | 0,39  | 0,62  | -0,01 | -0,17 | 0,599 | 0,223 |
| PC aa C42:4   | glycerophosp   | -0,12 | -0,37 | -0,27 | -0,35 | -0,06 | 0,601 | 0,221 |
| lysoPC a C16: | glycerophosp   | -0,01 | -0,14 | 0,51  | -0,23 | 0,21  | 0,610 | 0,215 |
| SM C22:3      | sphingolipids  | 0,62  | 0,31  | 0,33  | 0,36  | -0,12 | 0,615 | 0,211 |
| Gly           | aminoacids     | 0,57  | -0,11 | 0,45  | 0,55  | 0,27  | 0,615 | 0,211 |
| C10:2         | acylcarnitines | -0,54 | 0,19  | -0,39 | -0,62 | -0,33 | 0,619 | 0,208 |
| PC ae C42:2   | glycerophosp   | -0,19 | -0,10 | -0,03 | -0,14 | 0,06  | 0,651 | 0,187 |
| PC ae C32:2   | glycerophosp   | 0,03  | -0,09 | 0,00  | 0,03  | 0,05  | 0,654 | 0,184 |
| PC ae C42:3   | glycerophosp   | -0,18 | -0,33 | -0,21 | -0,21 | 0,04  | 0,669 | 0,174 |
| PC aa C42:5   | glycerophosp   | 0,00  | 0,08  | 0,03  | -0,03 | -0,04 | 0,673 | 0,172 |
| PC aa C42:6   | glycerophosp   | 0,15  | 0,10  | -0,01 | 0,15  | -0,06 | 0,677 | 0,170 |
| Trp           | aminoacids     | -0,25 | -0,56 | -0,33 | -0,34 | 0,07  | 0,705 | 0,152 |
| PC ae C36:1   | glycerophosp   | 0,02  | 0,12  | 0,03  | 0,08  | -0,01 | 0,748 | 0,126 |
| H1            | sugars         | -0,35 | -0,28 | -0,44 | -0,04 | 0,07  | 0,755 | 0,122 |
| lysoPC a C18: | glycerophosp   | 0,95  | 0,97  | 1,26  | 0,28  | -0,19 | 0,766 | 0,115 |
| PC ae C38:5   | glycerophosp   | 0,07  | -0,01 | 0,04  | 0,06  | 0,02  | 0,784 | 0,106 |
| SM C20:2      | sphingolipids  | 0,10  | 0,23  | 0,14  | 0,15  | -0,02 | 0,798 | 0,098 |
| lysoPC a C28: | glycerophosp   | 0,22  | 0,25  | -0,36 | 0,56  | -0,13 | 0,815 | 0,089 |
| SM (OH) C16:  | sphingolipids  | -0,02 | -0,09 | -0,04 | -0,06 | 0,00  | 0,845 | 0,073 |
| Orn           | aminoacids     | 1,07  | 0,43  | 0,61  | 0,72  | -0,08 | 0,867 | 0,062 |
| C14:1         | acylcarnitines | -0,39 | -0,46 | -0,28 | -0,62 | -0,03 | 0,877 | 0,057 |
| C18:2         | acylcarnitines | -0,06 | 0,06  | 0,39  | -0,60 | -0,10 | 0,881 | 0,055 |
| PC aa C40:4   | glycerophosp   | -0,02 | -0,10 | -0,03 | -0,08 | 0,00  | 0,900 | 0,046 |
| PC ae C30:2   | glycerophosp   | 0,18  | 0,13  | -0,05 | 0,32  | -0,02 | 0,944 | 0,025 |
| Gln           | aminoacids     | 0,13  | 0,08  | -0,06 | 0,25  | -0,01 | 0,950 | 0,022 |
| Phe           | aminoacids     | 0,45  | 0,08  | 0,20  | 0,29  | -0,02 | 0,951 | 0,022 |
| C3-DC (C4-OH) | acylcarnitines | -0,85 | -0,19 | -0,47 | -0,62 | -0,03 | 0,952 | 0,021 |
| PC aa C42:0   | glycerophosp   | 0,00  | -0,10 | -0,04 | -0,05 | 0,00  | 0,980 | 0,009 |

|               |           |       |       |       |       |      |       |       |
|---------------|-----------|-------|-------|-------|-------|------|-------|-------|
| lysoPC a C18: | glycerosp | 0,36  | 0,26  | 0,76  | -0,13 | 0,00 | 0,996 | 0,002 |
| PC ae C32:1   | glycerosp | -0,14 | -0,30 | -0,22 | -0,22 | 0,00 | 0,998 | 0,001 |
