# Supplementary material for: Novel diagnostic and therapeutic techniques reveal changed metabolic profiles in recurrent focal segmental glomerulosclerosis
Source: Springer Nature journal article supplement (doi:10.1038/s41598-021-83883-w), 2021-02-25
Supplement: MOESM6 [file 41598_2021_83883_MOESM6_ESM.pdf]

0

FSGS patient at time of disease recurrence    10 healthy controls from EPIC study    FSGS patient at time of disease recurrence    10 healthy controls from EPIC study

| Analyte        | Metabolite class     | Mean (Concentration in $\mu\text{M}$ , red FSGS> CTRL, green FSGS< CTRL) |                                     | SD                                         |                                     |
|----------------|----------------------|--------------------------------------------------------------------------|-------------------------------------|--------------------------------------------|-------------------------------------|
|                |                      | FSGS patient at time of disease recurrence                               | 10 healthy controls from EPIC study | FSGS patient at time of disease recurrence | 10 healthy controls from EPIC study |
| C0             | acylcarnitines       | 30,93                                                                    | 32,72                               | 14,40                                      | 7,07                                |
| C14:1          | acylcarnitines       | 0,16                                                                     | 0,09                                | 0,03                                       | 0,02                                |
| C18:2          | acylcarnitines       | 0,06                                                                     | 0,11                                | 0,02                                       | 0,01                                |
| C2             | acylcarnitines       | 3,89                                                                     | 5,36                                | 1,63                                       | 2,11                                |
| C3             | acylcarnitines       | 0,33                                                                     | 0,39                                | 0,07                                       | 0,08                                |
| C4             | acylcarnitines       | 0,40                                                                     | 0,42                                | 0,11                                       | 0,09                                |
| Arg            | aminoacids           | 87,13                                                                    | 56,06                               | 25,90                                      | 20,79                               |
| Gln            | aminoacids           | 812,25                                                                   | 536,50                              | 108,96                                     | 97,91                               |
| Gly            | aminoacids           | 314,50                                                                   | 169,01                              | 87,11                                      | 47,97                               |
| His            | aminoacids           | 83,90                                                                    | 60,68                               | 15,26                                      | 13,78                               |
| Met            | aminoacids           | 33,20                                                                    | 21,99                               | 8,75                                       | 5,64                                |
| Orn            | aminoacids           | 149,00                                                                   | 75,02                               | 47,24                                      | 23,79                               |
| Phe            | aminoacids           | 75,28                                                                    | 54,10                               | 16,81                                      | 9,60                                |
| Pro            | aminoacids           | 334,25                                                                   | 182,32                              | 43,22                                      | 62,33                               |
| Ser            | aminoacids           | 150,93                                                                   | 81,55                               | 44,47                                      | 16,01                               |
| Thr            | aminoacids           | 211,90                                                                   | 108,25                              | 78,01                                      | 29,21                               |
| Trp            | aminoacids           | 56,73                                                                    | 51,80                               | 11,35                                      | 9,23                                |
| Tyr            | aminoacids           | 67,00                                                                    | 60,48                               | 16,49                                      | 18,40                               |
| Orn/Arg ratio  | aminoacids           | 1,71                                                                     | 1,34                                |                                            |                                     |
| Thy/Phe        | aminoacids           | 0,89                                                                     | 1,12                                |                                            |                                     |
| lysoPC a C16:t | glycerophospholipids | 155,00                                                                   | 61,92                               | 47,53                                      | 16,65                               |
| lysoPC a C16:: | glycerophospholipids | 3,66                                                                     | 2,20                                | 1,16                                       | 0,98                                |
| lysoPC a C17:t | glycerophospholipids | 3,13                                                                     | 1,11                                | 0,88                                       | 0,31                                |
| lysoPC a C18:t | glycerophospholipids | 52,28                                                                    | 18,93                               | 14,55                                      | 4,83                                |
| lysoPC a C18:: | glycerophospholipids | 38,68                                                                    | 13,82                               | 12,37                                      | 4,52                                |
| lysoPC a C18:: | glycerophospholipids | 60,05                                                                    | 21,61                               | 19,30                                      | 5,35                                |
| lysoPC a C20:: | glycerophospholipids | 4,32                                                                     | 1,94                                | 1,74                                       | 0,42                                |
| lysoPC a C20:: | glycerophospholipids | 11,51                                                                    | 5,13                                | 4,53                                       | 1,32                                |
| lysoPC a C24:t | glycerophospholipids | 0,29                                                                     | 0,50                                | 0,03                                       | 0,07                                |
| lysoPC a C26:: | glycerophospholipids | 0,27                                                                     | 0,13                                | 0,06                                       | 0,03                                |
| lysoPC a C28:: | glycerophospholipids | 0,90                                                                     | 0,35                                | 0,17                                       | 0,07                                |
| PC aa C28:1    | glycerophospholipids | 4,39                                                                     | 2,27                                | 0,48                                       | 0,56                                |
| PC aa C30:0    | glycerophospholipids | 4,04                                                                     | 5,34                                | 0,47                                       | 1,51                                |
| PC aa C32:0    | glycerophospholipids | 19,35                                                                    | 15,69                               | 1,97                                       | 2,92                                |
| PC aa C32:1    | glycerophospholipids | 16,93                                                                    | 23,37                               | 3,37                                       | 12,91                               |
| PC aa C32:2    | glycerophospholipids | 4,67                                                                     | 4,94                                | 1,11                                       | 1,61                                |
| PC aa C32:3    | glycerophospholipids | 0,62                                                                     | 0,54                                | 0,12                                       | 0,09                                |
| PC aa C34:1    | glycerophospholipids | 217,50                                                                   | 208,89                              | 22,05                                      | 48,82                               |
| PC aa C34:2    | glycerophospholipids | 372,00                                                                   | 382,05                              | 40,23                                      | 49,75                               |
| PC aa C34:3    | glycerophospholipids | 17,90                                                                    | 17,21                               | 2,48                                       | 3,88                                |
| PC aa C34:4    | glycerophospholipids | 2,03                                                                     | 1,99                                | 0,66                                       | 0,57                                |

|             |                      |        |        |       |       |
|-------------|----------------------|--------|--------|-------|-------|
| PC aa C36:0 | glycerophospholipids | 2,26   | 1,47   | 0,45  | 0,45  |
| PC aa C36:1 | glycerophospholipids | 53,43  | 42,97  | 8,34  | 10,48 |
| PC aa C36:2 | glycerophospholipids | 234,00 | 219,81 | 26,85 | 27,99 |
| PC aa C36:3 | glycerophospholipids | 151,75 | 141,21 | 16,32 | 23,60 |
| PC aa C36:4 | glycerophospholipids | 208,25 | 194,34 | 30,46 | 28,59 |
| PC aa C36:5 | glycerophospholipids | 24,03  | 22,27  | 5,17  | 7,42  |
| PC aa C36:6 | glycerophospholipids | 0,89   | 0,94   | 0,23  | 0,28  |
| PC aa C38:0 | glycerophospholipids | 2,90   | 2,18   | 0,46  | 0,59  |
| PC aa C38:1 | glycerophospholipids | 0,72   | 0,92   | 0,29  | 0,39  |
| PC aa C38:3 | glycerophospholipids | 52,50  | 42,26  | 8,32  | 9,48  |
| PC aa C38:4 | glycerophospholipids | 116,45 | 100,35 | 24,78 | 16,44 |
| PC aa C38:5 | glycerophospholipids | 58,25  | 49,85  | 10,68 | 8,94  |
| PC aa C38:6 | glycerophospholipids | 82,13  | 70,40  | 8,52  | 15,92 |
| PC aa C40:2 | glycerophospholipids | 0,21   | 0,26   | 0,05  | 0,06  |
| PC aa C40:3 | glycerophospholipids | 0,39   | 0,44   | 0,03  | 0,06  |
| PC aa C40:4 | glycerophospholipids | 2,60   | 2,92   | 0,39  | 0,60  |
| PC aa C40:5 | glycerophospholipids | 7,68   | 8,14   | 1,20  | 2,02  |
| PC aa C40:6 | glycerophospholipids | 23,20  | 20,93  | 2,81  | 5,34  |
| PC aa C42:0 | glycerophospholipids | 0,35   | 0,42   | 0,05  | 0,11  |
| PC aa C42:1 | glycerophospholipids | 0,16   | 0,21   | 0,03  | 0,06  |
| PC aa C42:2 | glycerophospholipids | 0,12   | 0,18   | 0,02  | 0,04  |
| PC aa C42:4 | glycerophospholipids | 0,11   | 0,17   | 0,02  | 0,03  |
| PC aa C42:6 | glycerophospholipids | 0,27   | 0,57   | 0,04  | 0,06  |
| PC ae C30:0 | glycerophospholipids | 0,39   | 0,67   | 0,08  | 0,13  |
| PC ae C30:2 | glycerophospholipids | 0,13   | 0,09   | 0,02  | 0,02  |
| PC ae C32:1 | glycerophospholipids | 3,36   | 2,59   | 0,56  | 0,61  |
| PC ae C32:2 | glycerophospholipids | 0,95   | 0,63   | 0,14  | 0,16  |
| PC ae C34:0 | glycerophospholipids | 1,83   | 1,78   | 0,35  | 0,40  |
| PC ae C34:1 | glycerophospholipids | 13,33  | 9,09   | 1,88  | 2,10  |
| PC ae C34:2 | glycerophospholipids | 19,00  | 10,39  | 2,21  | 1,98  |
| PC ae C34:3 | glycerophospholipids | 11,49  | 6,44   | 1,94  | 1,30  |
| PC ae C36:0 | glycerophospholipids | 0,81   | 0,98   | 0,12  | 0,18  |
| PC ae C36:1 | glycerophospholipids | 9,72   | 7,09   | 0,93  | 1,65  |
| PC ae C36:2 | glycerophospholipids | 18,38  | 12,44  | 2,09  | 2,83  |
| PC ae C36:3 | glycerophospholipids | 10,70  | 6,48   | 1,24  | 1,05  |
| PC ae C36:4 | glycerophospholipids | 27,78  | 15,23  | 3,40  | 3,10  |
| PC ae C36:5 | glycerophospholipids | 15,58  | 9,65   | 2,42  | 1,80  |
| PC ae C38:0 | glycerophospholipids | 1,79   | 2,04   | 0,26  | 0,47  |
| PC ae C38:1 | glycerophospholipids | 0,41   | 0,61   | 0,26  | 0,30  |
| PC ae C38:2 | glycerophospholipids | 2,06   | 1,64   | 0,11  | 0,29  |
| PC ae C38:3 | glycerophospholipids | 4,78   | 3,51   | 0,97  | 0,78  |
| PC ae C38:4 | glycerophospholipids | 17,88  | 10,88  | 3,95  | 2,39  |
| PC ae C38:5 | glycerophospholipids | 24,85  | 14,41  | 3,56  | 2,80  |
| PC ae C38:6 | glycerophospholipids | 8,96   | 5,88   | 1,13  | 1,36  |
| PC ae C40:1 | glycerophospholipids | 1,23   | 1,09   | 0,17  | 0,27  |
| PC ae C40:2 | glycerophospholipids | 1,82   | 1,22   | 0,14  | 0,24  |
| PC ae C40:3 | glycerophospholipids | 0,92   | 0,92   | 0,12  | 0,23  |
| PC ae C40:4 | glycerophospholipids | 2,16   | 1,78   | 0,32  | 0,47  |
| PC ae C40:5 | glycerophospholipids | 3,50   | 2,80   | 0,62  | 0,75  |
| PC ae C40:6 | glycerophospholipids | 4,58   | 3,30   | 0,55  | 0,73  |

|                     |                      |         |         |        |        |
|---------------------|----------------------|---------|---------|--------|--------|
| <b>PC ae C42:2</b>  | glycerophospholipids | 0,42    | 0,39    | 0,05   | 0,08   |
| <b>PC ae C42:3</b>  | glycerophospholipids | 0,53    | 0,78    | 0,08   | 0,13   |
| <b>PC ae C44:3</b>  | glycerophospholipids | 0,07    | 0,83    | 0,02   | 0,08   |
| <b>PC ae C44:5</b>  | glycerophospholipids | 1,16    | 1,05    | 0,28   | 0,37   |
| <b>PC ae C44:6</b>  | glycerophospholipids | 0,72    | 0,74    | 0,13   | 0,26   |
| <b>SM (OH) C14:</b> | sphingolipids        | 8,76    | 6,33    | 1,29   | 1,46   |
| <b>SM (OH) C16:</b> | sphingolipids        | 3,92    | 3,49    | 0,56   | 0,81   |
| <b>SM (OH) C22:</b> | sphingolipids        | 8,71    | 9,84    | 1,24   | 1,70   |
| <b>SM (OH) C22:</b> | sphingolipids        | 9,73    | 8,10    | 1,53   | 1,95   |
| <b>SM (OH) C24:</b> | sphingolipids        | 0,74    | 0,95    | 0,12   | 0,20   |
| <b>SM C16:0</b>     | sphingolipids        | 109,33  | 115,76  | 15,77  | 14,07  |
| <b>SM C16:1</b>     | sphingolipids        | 18,58   | 15,81   | 2,69   | 2,60   |
| <b>SM C18:0</b>     | sphingolipids        | 24,25   | 22,52   | 3,27   | 5,15   |
| <b>SM C18:1</b>     | sphingolipids        | 11,46   | 10,66   | 1,88   | 2,65   |
| <b>SM C20:2</b>     | sphingolipids        | 0,71    | 0,51    | 0,07   | 0,11   |
| <b>SM C22:3</b>     | sphingolipids        | 5,39    | 0,19    | 1,25   | 0,31   |
| <b>SM C24:0</b>     | sphingolipids        | 13,03   | 15,27   | 1,54   | 1,86   |
| <b>SM C24:1</b>     | sphingolipids        | 36,88   | 35,46   | 4,93   | 5,58   |
| <b>SM C26:0</b>     | sphingolipids        | 0,12    | 0,11    | 0,03   | 0,04   |
| <b>SM C26:1</b>     | sphingolipids        | 0,26    | 0,23    | 0,06   | 0,08   |
| <b>H1</b>           | sugars               | 5695,25 | 4589,39 | 588,41 | 890,44 |

**Difference FSGS  
patient at time of  
disease recurrence  
versus healthy controls**

**p-Wert (red,  $p < 0,05$ )**

|  |         |
|--|---------|
|  | 8,2E-01 |
|  | 1,4E-02 |
|  | 8,3E-03 |
|  | 1,8E-01 |
|  | 1,5E-01 |
|  | 7,3E-01 |
|  | 9,0E-02 |
|  | 9,2E-03 |
|  | 4,0E-02 |
|  | 4,7E-02 |
|  | 7,8E-02 |
|  | 4,9E-02 |
|  | 8,2E-02 |
|  | 1,1E-03 |
|  | 5,1E-02 |
|  | 7,5E-02 |
|  | 4,6E-01 |
|  | 5,1E-01 |
|  | 2,8E-02 |
|  | 8,0E-02 |
|  | 1,8E-02 |
|  | 1,8E-02 |
|  | 2,6E-02 |
|  | 2,7E-02 |
|  | 7,1E-02 |
|  | 6,6E-02 |
|  | 9,3E-06 |
|  | 1,8E-02 |
|  | 6,7E-03 |
|  | 6,2E-04 |
|  | 5,6E-03 |
|  | 2,1E-02 |
|  | 6,9E-02 |
|  | 7,0E-01 |
|  | 3,4E-01 |
|  | 5,9E-01 |
|  | 6,8E-01 |
|  | 6,6E-01 |
|  | 9,2E-01 |

2,9E-02

7,9E-02

3,9E-01

3,2E-01

4,5E-01

5,9E-01

7,3E-01

4,0E-02

2,9E-01

8,3E-02

2,9E-01

2,2E-01

6,7E-02

1,1E-01

8,2E-02

2,2E-01

5,6E-01

2,5E-01

1,2E-01

4,7E-02

5,4E-03

7,0E-03

5,5E-06

9,7E-04

1,0E-02

6,2E-02

1,1E-02

8,1E-01

1,1E-02

1,9E-03

1,0E-02

4,3E-02

2,6E-03

3,6E-03

3,4E-03

2,3E-03

1,2E-02

1,6E-01

2,3E-01

2,1E-04

7,2E-02

3,4E-02

6,1E-03

5,0E-03

2,4E-01

2,2E-04

9,7E-01

9,8E-02

1,1E-01

8,6E-03

2,8E-01

2,0E-03

2,9E-21

5,0E-01

8,8E-01

2,3E-02

2,5E-01

1,8E-01

1,2E-01

2,1E-02

4,9E-01

1,3E-01

4,2E-01

5,0E-01

2,7E-03

3,4E-03

5,1E-02

6,3E-01

6,5E-01

3,4E-01

2,0E-02
